# Supplementary material for: Current knowledge on spinal meningiomas: a systematic review protocol
Source: PubMed Central journal article supplement — BMJ Open. 2022 Jun 22;12(6):e061614. doi: 10.1136/bmjopen-2022-061614 (PMC9226977; doi:10.1136/bmjopen-2022-061614), 2022-06-22
Supplement: bmjopen-2022-061614.draft_revisions.pdf [file bmjopen-2022-061614.draft_revisions.pdf]

# BMJ Open

BMJ Open is committed to open peer review. As part of this commitment we make the peer review history of every article we publish publicly available.

When an article is published we post the peer reviewers' comments and the authors' responses online. We also post the versions of the paper that were used during peer review. These are the versions that the peer review comments apply to.

The versions of the paper that follow are the versions that were submitted during the peer review process. They are not the versions of record or the final published versions. They should not be cited or distributed as the published version of this manuscript.

BMJ Open is an open access journal and the full, final, typeset and author-corrected version of record of the manuscript is available on our site with no access controls, subscription charges or pay-per-view fees (<http://bmjopen.bmj.com>).

If you have any questions on BMJ Open's open peer review process please email [info.bmjopen@bmj.com](mailto:info.bmjopen@bmj.com)

# BMJ Open

## Current knowledge on spinal meningiomas: a systematic review protocol

|                               |                                                                                                                                                                                                                                                                                                                                                                                                                                                                                                                                                                                                                                                                                                                                          |
|-------------------------------|------------------------------------------------------------------------------------------------------------------------------------------------------------------------------------------------------------------------------------------------------------------------------------------------------------------------------------------------------------------------------------------------------------------------------------------------------------------------------------------------------------------------------------------------------------------------------------------------------------------------------------------------------------------------------------------------------------------------------------------|
| Journal:                      | <i>BMJ Open</i>                                                                                                                                                                                                                                                                                                                                                                                                                                                                                                                                                                                                                                                                                                                          |
| Manuscript ID                 | bmjopen-2022-061614                                                                                                                                                                                                                                                                                                                                                                                                                                                                                                                                                                                                                                                                                                                      |
| Article Type:                 | Protocol                                                                                                                                                                                                                                                                                                                                                                                                                                                                                                                                                                                                                                                                                                                                 |
| Date Submitted by the Author: | 31-Jan-2022                                                                                                                                                                                                                                                                                                                                                                                                                                                                                                                                                                                                                                                                                                                              |
| Complete List of Authors:     | El-Hajj, Victor Gabriel; Karolinska University Hospital, Department of Neurosurgery; Karolinska Institute, Department of Clinical Neuroscience<br>Pettersson Segerlind, Jenny; Karolinska University Hospital, Department of Neurosurgery; Karolinska Institute, Department of Clinical Neuroscience<br>Burström, Gustav ; Karolinska University Hospital, Department of Neurosurgery; Karolinska Institute, Department of Clinical Neuroscience<br>Edström, Erik; Karolinska University Hospital, Department of Neurosurgery; Karolinska Institute, Department of Clinical Neuroscience<br>Elmi-Terander, Adrian; Karolinska University Hospital, Department of Neurosurgery; Karolinska Institute, Department of Clinical Neuroscience |
| Keywords:                     | NEUROSURGERY, Neurological oncology < NEUROLOGY, Neurosurgery < SURGERY, Spine < ORTHOPAEDIC & TRAUMA SURGERY, ONCOLOGY                                                                                                                                                                                                                                                                                                                                                                                                                                                                                                                                                                                                                  |
|                               |                                                                                                                                                                                                                                                                                                                                                                                                                                                                                                                                                                                                                                                                                                                                          |

SCHOLARONE™  
Manuscripts

# Title: Current knowledge on spinal meningiomas: a systematic review protocol

## Author information

---

### Author notes

- <sup>1,2</sup>Victor Gabriel El-Hajj ([victor.gababriel.elhajj@stud.ki.se](mailto:victor.gababriel.elhajj@stud.ki.se))  
<sup>1,2</sup>Jenny Pettersson-Segerlind, MD ([jenny.pettersson.segerlind@ki.se](mailto:jenny.pettersson.segerlind@ki.se))  
<sup>1,2</sup>Gustav Burström, MD, PhD ([gustav.burstrom@ki.se](mailto:gustav.burstrom@ki.se))  
<sup>1,2</sup>Erik Edström, MD, PhD ([erik.edstrom.1@ki.se](mailto:erik.edstrom.1@ki.se))  
<sup>1,2</sup>Adrian Elmi-Terander, Md, PhD ([adrian.elmi.terander@ki.se](mailto:adrian.elmi.terander@ki.se))

### Affiliations

- <sup>1</sup>Department of Neurosurgery, Karolinska University Hospital, Stockholm, Sweden  
<sup>2</sup>Department of Clinical Neuroscience, Karolinska Institutet, Stockholm, Sweden

### Corresponding and author

Victor Gabriel El-Hajj  
Adress: Karolinska University Hospital, Department of Neurosurgery, Eugeniavägen 6, 4th floor, Solna, Stockholm 17164.  
ORCID: <https://orcid.org/0000-0001-9479-761X>  
Email: [victor.gabriel.elhajj@stud.ki.se](mailto:victor.gabriel.elhajj@stud.ki.se)  
Number: +467659889449

**Keywords:** systematic review, spinal meningioma, current knowledge, treatment, outcomes.

**Word count:** 2700 (excluding title page, abstract, statements & references).

## 38 Abstract

---

### 39 Introduction

40 Meningiomas are primary CNS tumors that arise from both cranial and spinal meninges.  
41 Spinal meningiomas occur less frequently than their cranial counterparts and are  
42 consequently given less attention in the literature. Therefore, systematic studies are needed to  
43 summarize the current knowledge on spinal meningiomas, providing a solid evidence base  
44 for treatment strategies. This systematic review of the literature will therefore assess studies  
45 describing spinal meningiomas, their epidemiology, diagnostics, treatment, and outcomes.  
46

### 47 Methods and Analysis

48 Electronic databases including PubMed, Web of Science and Embase, will be searched using  
49 the keywords "spinal" and "meningioma". The search will be set to provide only the studies  
50 published after 2000 to avoid any conflicts regarding terminology and classification, as well  
51 as to reflect the current status. Case reports, editorials, letters, and reviews will also be  
52 excluded. Reference lists of relevant records will also be searched. Identified studies will be  
53 screened for inclusion, by one reviewer in a first step and then three in the next step to  
54 decrease the risk of bias. The results will be categorized to allow for a structured summary of  
55 the outcomes and their evidence grade conforming to the GRADE approach. Categories may  
56 include: epidemiology, histopathology, radiological diagnostics, surgery, complications, non-  
57 surgical or adjuvant treatments, disease outcomes and predictors, and lastly recurrence.  
58

### 59 Ethics and dissemination

60 This review will summarize the current knowledge on spinal meningiomas to allow for a  
61 better understanding of the disease and contribute to improve its management. For clinicians,  
62 the systematic collection and grading of available evidence may aid in decision-making and  
63 for those seeking to further the scientific field, this review may help to identify areas where  
64 knowledge is currently lacking.  
65

## 66 **Strengths and limitations**

---

- 67 • We developed a thorough strategy to assess both risk of bias in individual studies as  
68 well as the collective quality of evidence with respect to the GRADE guidelines.
- 69 • To our knowledge there are no other studies systematically reviewing the current  
70 knowledge on spinal meningiomas.
- 71 • The predicted high heterogeneity among studies prevents the conduction of a meta-  
72 analysis, which constitutes the main limitation to this review.

## 79 Introduction

80 Meningiomas originate from the arachnoid cap cells in the leptomeninges surrounding the  
81 brain and spinal cord. Hence, they occur most frequently in an intradural extramedullary  
82 location. Meningiomas of the spinal cord are less common, making up only about 2-12% of  
83 all meningiomas<sup>1-3</sup>. In fact, much of what we know today is derived from studies on  
84 intracranial meningiomas. Spinal meningiomas are the most common primary spinal tumor in  
85 adults, representing 25-45% of all tumors and occur with an age-adjusted incidence of 0.33  
86 per 100, 000 population<sup>1</sup>. Most spinal meningiomas (90%) are benign, WHO I tumors<sup>4-6</sup>,  
87 mainly seen in the elderly with a peak incidence between the seventh and ninth decades of  
88 life<sup>2,4</sup>. Regardless of their location, meningiomas are more commonly found in females. For  
89 spinal meningiomas the female to male ratio is around 4:1<sup>2,4,7,8</sup>. Most meningiomas occur  
90 sporadically but a known genetic association to neurofibromatosis type 2 (NF2) is  
91 established, and it is estimated that up to 20% of patients with NF2 will develop spinal  
92 meningiomas, which might even appear earlier on in life<sup>9,10</sup>. Mutations of the NF2 tumor  
93 suppressor gene or loss of chromosome 22 harboring this gene was found to be more frequent  
94 among spinal meningiomas of WHO grades II and III<sup>11,12</sup>. Exposure to high-dose ionizing  
95 radiation is also associated with earlier onset of spinal meningioma<sup>1,13</sup>. Meningiomas often  
96 carry estrogen or progesterone receptors<sup>14</sup>, suggesting pregnancy as a potential risk factor for  
97 tumor growth<sup>15,16</sup>. This association was however refuted by a large population-based cohort  
98 study<sup>17</sup>. Spinal meningiomas may produce neurologic deficits and pain related to local  
99 compression of the spinal cord, nerves and adjacent structures<sup>4,18</sup>. The diagnosis is best made  
100 using MRI where meningiomas show homogenous enhancement on gadolinium enhanced T1  
101 sequences. Meningiomas also typically display dural tails, enhancement and thickening of the  
102 dura extending from the tumor<sup>19</sup>. The treatment of choice is surgery, where tumor removal  
103 typically alleviates symptoms with little risk of complications or recurrence<sup>4,7</sup>. In surgery of  
104 meningiomas, Simpson grading is used to describe the radicality of tumor removal and to  
105 predict the risk for tumor recurrence. Whether Simpson grade I, which includes complete  
106 removal of dural attachments, should be the goal of spinal meningioma surgery, remains a  
107 topic of debate<sup>4,20-23</sup>. The Simpson scale also addresses the removal or coagulation of the  
108 affected dura. Aggressive removal of the dura may reduce the risk of recurrence but increases  
109 the risk of spinal cord injury and postoperative leakage of cerebrospinal fluid. The most  
110 commonly reported postoperative complications are wound infections, cerebrospinal fluid  
111 leaks, kyphosis, venous thromboembolisms, and transient or permanent neurologic  
112 deficits<sup>4,7,24-26</sup>. However, these complications are rare and improvement of neurological  
113 function after tumor removal is expected in the majority of patients<sup>4,27</sup>. For patients having  
114 undergone Simpson Grade 2 resection of a spinal meningioma, Heon Kim et al have  
115 estimated a mean clinical recurrence-free survival period of 17 years<sup>21</sup>. Poor outcomes on the  
116 other hand, are reportedly associated with factors like: WHO tumor grade > 1, high Ki-67  
117 index, long time to diagnosis, large tumor size and the degree of spinal cord compression<sup>4,6,28</sup>  
118 while mortality mainly reflects high age or co-morbidities<sup>4,7</sup>. Very little data on health-related  
119 quality of life after spinal meningioma surgery is available. Two studies with mixed groups  
120 of intradural extramedullary tumors found that the vast majority of patients who underwent  
121 surgery saw a significant improvement of activity, mood, walking ability, quality of relations,  
122 sleep, and a decrease in pain<sup>29,30</sup>. These findings are consistent with the results of a quality-  
123 of-life questionnaire our group conducted on 84 spinal meningioma patients at an average of  
124 8.7 years after surgery<sup>31</sup>. The need for alternative or adjuvant therapies is emphasized in the  
125 literature, especially for recurring and higher-grade tumors (WHO II-III) or for patients who  
126 are poor surgical candidates<sup>26,32</sup>. In these cases, other treatment modalities may have to be

127 explored. However, the role of nonsurgical treatment options in the management of spinal  
 128 meningiomas remains poorly defined.  
 129 The systematic review proposed with this protocol aims to create a comprehensive overview  
 130 of the current understanding of spinal meningiomas, as well as to clarify the evidence base  
 131 for the treatment strategies employed today. Topics which will be reviewed include  
 132 epidemiology, tumor characteristics, diagnostics, treatment options with their potential risks  
 133 and benefits, as well as outcomes including quality of life, mortality, and recurrence. The  
 134 created overview will serve as a foundation for treatment choices and possibly to identify  
 135 areas of insufficient knowledge, warranting renewed scientific effort.  
 136 Instead of the more classic PICO criteria (Population, Intervention, Comparison, Outcome),  
 137 we decide to use the SPIDER criteria<sup>33</sup> (Sample, Phenomenon of Interest, Design, Evaluation,  
 138 Research type) which we believe are more suited to the purpose of this review (Table 1).

139  
 140 *Table 1: SPIDER criteria<sup>33</sup>.*

|                        |                                                                                              |
|------------------------|----------------------------------------------------------------------------------------------|
| Sample                 | Any patient                                                                                  |
| Phenomenon of Interest | Spinal meningiomas                                                                           |
| Design                 | Studies presenting original numeric data on the different topics of interest                 |
| Evaluation             | Epidemiology, tumor characteristics, diagnostics, treatment, patient outcome, and recurrence |
| Research Type          | Experimental and observational studies                                                       |

## 141 142 143 **Methods/Design**

### 144 Patient and public involvement:

145 Patients were not involved in the design or conception of the study.  
 146

### 147 Study registration

148 This protocol for an intended systematic review is reported according to the Preferred  
 149 Reporting Items for Systematic Reviews and Meta-Analyses Protocol (PRISMA-P) statement  
 150 of 2015<sup>34</sup>. The PRISMA-P checklist is provided as supplementary material (see  
 151 *supplementary file 1*). The systematic review protocol will also be registered on PROSPERO,  
 152 before submission of the final manuscript to a peer reviewed journal.  
 153

### 154 Eligibility criteria

#### 155 **Inclusion criteria**

#### 156 Type of studies

157 All peer reviewed and original studies, written in English and available in the PubMed,  
 158 Embase, or Web of Science databases, will be eligible for inclusion. Only studies published  
 159 after 2000 will be included to limit our review to the more current publications within the  
 160 field.  
 161

#### 162 Type of participant

1  
2  
3 163 All patients will be included, regardless of age, ethnicity, and sex. Similarly, all spinal  
4 164 meningiomas irrespective of size, tumor grading or anatomical locations along the spine will  
5 165 be included. However, an adequate diagnosis of the tumor must be available and based on  
6 166 histological examination or MRI investigations.

8  
9 167

## 10 168 Type of interventions

12 169 All modes of diagnosis and treatment of spinal meningiomas will be included.

13 170

## 15 171 Type of outcome measurements

16 172 Epidemiological data such as age, sex and socioeconomic factors, possible predictors of poor  
17 173 preoperative or postoperative decline such as comorbidity and spinal cord compression will  
18 174 also be addressed. Furthermore, outcome parameters including pain, neurological function,  
19 175 quality of life, tumor recurrence and mortality, tumor characteristics including expression of  
20 176 specific receptors, markers of proliferative activity, and WHO grade will also be included.

22 177 Additional outcomes used in the selected studies may be considered. In those cases, the  
23 178 possibility of reporting biases will be recognized.

25 179

## 27 180 **Exclusion criteria**

28 181 Non-original publications such as reviews, editorials, and letters to the editor will be  
29 182 disregarded together with case reports and conference abstracts. Studies found in languages  
30 183 other than English will be excluded for practical reasons. Publications prior to the year of  
31 184 2000 will also be excluded to reduce the number of included studies and give priority to more  
32 185 current publications.

34 186

## 36 187 Databases and search strategy

38 188 An electronic database search will be performed on PubMed, Embase, and Web of Science.  
39 189 The search will be broad, excluding case reports by adding a filter to the search. Appropriate  
40 190 filters will also be used to exclude non-English studies and those published prior to the year  
41 191 2000. To illustrate the process, the preliminary search strategy specific to the Web of Science  
42 192 database is provided (see *supplementary file 2*). A reference list search of the included studies  
43 193 will be performed, to screen for any eligible article that was missed.

45 194

## 47 195 Study selection

49 196 The records retrieved from the different databases will be exported into Zotero<sup>35</sup>, to eliminate  
50 197 duplicates. The records will then be screened based on title and abstract by one reviewer, to  
51 198 eliminate records that are plainly irrelevant. This is necessary as an unmanageable number of  
52 199 records is foreseen due to the broad search strategy that will be used. In the next step, three  
53 200 independent and blinded reviewers will be assigned the task of examining the remaining  
54 201 records applying the eligibility criteria based on full-text reading. This will be performed  
55 202 using Rayyan Software<sup>36</sup>. Potential disagreements after pooling of the results will be resolved  
56 203 by discussion with a fourth reviewer. Finally, reference lists of the selected articles will be  
57 204 reviewed for any potentially eligible studies that were previously missed. The process will be  
58 205 illustrated in a PRISMA flowchart which will be provided.

206

## 207 Data extraction

208 Data from selected records will be extracted using a predefined extraction template,  
 209 preliminarily including (1) general information—title, first author, journal, publication year,  
 210 etc.; (2) patient characteristics and epidemiology—age, sex, tumor location, and grade, etc.;  
 211 (3) intervention characteristics—imaging, Simpson grade, adjuvant therapy, etc.; (4) study  
 212 characteristics—study type, sample size, follow-up time, etc.; and (5) outcomes—  
 213 neurological outcomes, quality of life, recurrence rate, mortality rate, follow-up time, adverse  
 214 events and their management, main conclusions, etc. The collaboration of multiple reviewers  
 215 will be sought to achieve thorough extraction of the data. The final work will even be  
 216 assessed and cross-checked to prevent any error.

## 218 Assessment of risk of bias

219 The Oxford Center for Evidence-Based Medicine system<sup>37</sup>, modified by Wright et al, will be  
 220 used to assess evidence levels<sup>38,39</sup> (table 2). The selected articles will first be allocated to one  
 221 of only four levels based on methodological quality, since the fifth level (V) is solely  
 222 associated to expert opinions which are systematically excluded from our study. Then, an  
 223 individual score (IS) will be proposed, as we account for the risk of bias accordingly: studies  
 224 with lower risk of bias will be upgraded while those with higher risk of bias will get  
 225 downgraded. Risk of bias will be assessed using the appropriate tools specific to the type of  
 226 study, as defined by Ma et al<sup>40</sup>. The final IS will also range from I to IV.

227  
 228 *Table 2 Level of evidence based on primary research question, by Wright et al<sup>38</sup>.*

|           | Therapeutic Studies—<br>Investigating the results of<br>treatment                                                                                                         | Prognostic Studies—<br>Investigating the outcome of<br>disease                                                                                               | Diagnostic Studies—Investigating a diagnostic<br>test                                                                                                                                           |
|-----------|---------------------------------------------------------------------------------------------------------------------------------------------------------------------------|--------------------------------------------------------------------------------------------------------------------------------------------------------------|-------------------------------------------------------------------------------------------------------------------------------------------------------------------------------------------------|
| Level I   | 1. Good-quality randomized<br>controlled trial,<br>2. Systematic review of Level-I<br>studies                                                                             | 1. Prospective study,<br>2. Systematic review of Level-<br>I studies                                                                                         | 1. Testing of previously developed diagnostic<br>criteria in series of consecutive patients (with<br>universally applied reference "gold" standard),<br>2. Systematic review of Level-I studies |
| Level II  | 1. Prospective cohort study,<br>2. Poor-quality randomized<br>controlled trial,<br>3. Systematic review,<br>a. Level-II studies,<br>b. Nonhomogeneous Level-<br>I studies | 1. Retrospective study,<br>2. Study of untreated controls<br>from a previous randomized<br>controlled trial,<br>3. Systematic review of Level-<br>II studies | 1. Development of diagnostic criteria on basis of<br>consecutive patients (with universally applied<br>reference "gold" standard),<br>2. Systematic review of Level-II studies                  |
| Level III | 1. Case-control study,<br>2. Retrospective cohort study,<br>3. Systematic review of Level-III<br>studies                                                                  |                                                                                                                                                              | 1. Study of nonconsecutive patients (no<br>consistently applied reference "gold" standard),<br>2. Systematic review of Level-III studies                                                        |
| Level IV  | Case series (with no, or historical,<br>control group)                                                                                                                    | Case series                                                                                                                                                  | 1. Case-control study,<br>2. Poor reference standard                                                                                                                                            |
| Level V   | Expert opinion                                                                                                                                                            | Expert opinion                                                                                                                                               | Expert opinion                                                                                                                                                                                  |

229

## 230 Quality of evidence across studies.

231 The Grading of Recommendations, Assessment, Development, and Evaluation (GRADE)<sup>41</sup>  
 232 approach will be used to rate the body of evidence behind key study outcomes assessing their  
 233 strength or certainty level. First, a baseline level will be set for each study outcome based on



the IS of the majority of studies contributing to that specific outcome, such as: if the majority of studies have an individual score of I or II the baseline grade of evidence supporting the study outcome will be classified as "high", and if the majority have individual scores of either III or IV, the baseline grade of evidence will be classified as "low". After that, we will properly adjust the baseline score after different factors like, large effect magnitude, dose-response gradient, inconsistency, indirectness, imprecision, etc.<sup>41</sup> to obtain a final quality of evidence grade of "high", "moderate", "low" or "very low"<sup>39</sup> (Table 3).

Table 3: *Quality of Evidence Grades, from the GRADE Handbook (Chapter 5)*<sup>41</sup>.

| Quality         | Definition                                                                                                                                                            |
|-----------------|-----------------------------------------------------------------------------------------------------------------------------------------------------------------------|
| <b>High</b>     | We are very confident that the true effect lies close to that of the estimate of the effect.                                                                          |
| <b>Moderate</b> | We are moderately confident in the effect estimate; the true effect is likely to be close to the estimate of the effect, but there it may be substantially different. |
| <b>Low</b>      | Our confidence in the effect estimate is limited; the true effect may be substantially different from the estimate of the effect.                                     |
| <b>Very low</b> | We have very little confidence in the effect estimate; the true effect is likely to be substantially different from the estimate of effect.                           |

We will refer to the GRADE handbook<sup>41</sup> for further assistance on this approach. A summary of findings table will be generated using the Guideline development tool (GRADEpro GDT)<sup>42</sup>. The table will convey the key study outcomes with their corresponding level of certainty (grade of evidence), in a structured and transparent manner.

### Data synthesis:

After extraction, the data obtained from eligible studies will be systematically presented. Topics of interest to this review are chosen as follows:

1. Patient characteristics: epidemiology,
2. Tumor characteristics: histopathology, WHO grading,
3. Radiological diagnostics,
4. Surgical treatment: technique, Simpson grading, intraoperative monitoring,
5. Complications and their management,
6. Non-surgical or adjuvant treatment including radiotherapy,
7. Patient outcomes: neurological outcomes, quality of life, mortality,
8. Recurrence.

Relevant data will be compiled under corresponding headings. Areas with lack of data will still be mentioned. After going through the GRADE approach, all study outcomes will be condensed in a summary of findings table, each contrasted to their respective grade of evidence. Meta-analysis will not be performed due to the anticipated high heterogeneity across the selected studies, with regards to participant and tumor characteristics as well as outcomes. In these settings, a quantitative study would therefore likely be less valuable. If an adequate number of studies is identified, subgroup analyses regarding interethnic variations and socioeconomic factors may be performed. Moreover, other subgroups reported in the eligible studies will be considered, as long as an adequate number of studies exists to support the analysis. When dealing with any such subgroups the possibility of selective reporting bias will be closely monitored<sup>43</sup>.

271  
272  
273

## Ethics and dissemination

274 The intended systematic review outlined in this protocol aims to summarize the current  
275 scientific literature on spinal meningiomas to provide guidance to clinicians and identify  
276 areas in need of further study. The available literature covers many aspects of spinal  
277 meningiomas, such as incidence<sup>2,8,44</sup>, age<sup>2,4</sup>, and gender distribution<sup>2,4,7,8</sup>, treatments and their  
278 outcomes<sup>4,45,46</sup>, but many studies are limited by small sample<sup>3,46–54</sup> sizes and short follow-up  
279 times<sup>3,48,50,55</sup>. Regarding the effect of preoperative neurological impairment, tumor grade and  
280 size on postoperative outcomes<sup>3,28,48,50–57</sup> and adjuvant therapies<sup>26,32</sup> the available data is  
281 conflicting. These issues will be addressed by the systematic review's design, as integrating  
282 data from diverse origins will allow for a more representative synthesis that reflects the  
283 population of patients with spinal meningiomas more accurately<sup>58</sup>. The absence of both  
284 randomized trials and high-quality evidence within the literature as well as the dominance of  
285 observational and cohort studies is already apparent, making up the largest limitation to our  
286 review. Other limitations eventually encountered during the writing of the manuscript will be  
287 discussed in the corresponding part of the review.

288 This study ought to be regarded as a reliable source for clinicians to access current evidence  
289 compiled in a systematic way and hence better understand the tumor, its epidemiology,  
290 management, and prognosis. Greater knowledge of the subject will eventually contribute to  
291 improving the diagnosis and care delivery of affected patients. Moreover, the planned  
292 systematic review could also help disclose knowledge gaps in the field, identifying and  
293 highlighting future research priorities<sup>59</sup>. To the best of our knowledge, no systematic review  
294 outlining the current understanding of spinal meningiomas has been attempted to this date,  
295 making our study the first of its kind. The protocol hereby presented is in accordance with the  
296 PRISMA-P guidelines, (see *supplementary file 1*). For further transparency, this protocol will  
297 also be registered on PROSPERO in due time. The record on PROSPERO will be updated  
298 should significant changes to the procedure take place. The final manuscript is intended for  
299 submission to peer-reviewing.

300

## Abbreviations

302 IS = individual score  
303 GRADE = Grading of Recommendations, Assessment, Development and Evaluation  
304 MRI = Magnetic Resonance Imaging  
305 NF2 = Neurofibromatosis type 2  
306 PICO = Population, Intervention, Comparison, Outcome  
307 PRISMA = Preferred Reporting Items for Systematic Reviews and Meta-Analyses  
308 SPIDER = Sample, Phenomenon of Interest, Design, Evaluation, Research type  
309 WHO = World health Organization

310

## Availability of data and materials

312 Not applicable.

313

## 314 Competing interests

---

315 No competing interests are reported by any of the authors.

316

## 317 Contributions

---

- 318 • Victor Gabriel El-Hajj: conception & design of the work, drafting of the article, critical  
319 revision, and final approval of the version to be published.
- 320 • Jenny Pettersson-Segerlind: conception & design of the work, drafting of the article,  
321 and final approval of the version to be published.
- 322 • Gustav Liu Burström: conception & design of the work, drafting of the article, and  
323 final approval of the version to be published.
- 324 • Erik Edström: conception & design of the work, drafting of the article, critical  
325 revision, and final approval of the version to be published.
- 326 • Adrian Elmi-Terander: guarantor of the review, conception & design of the work,  
327 drafting of the article, critical revision, and final approval of the version to be  
328 published.
- 329

## 330 Funding

---

331 Not applicable.

332

## 333 Ethics declarations

---

334 Ethics approval and consent to participate

335 Not applicable.

336 Consent for publication

337 Not applicable.

338

## 339 Acknowledgements

---

340 Not applicable.

341

## 342 References

---

- 343 1. Ogasawara, C., Philbrick, B. D., & Adamson, D. C. (2021). Meningioma: A Review of  
344 Epidemiology, Pathology, Diagnosis, Treatment, and Future Directions. *Biomedicines*,  
345 9(3), 319. <https://doi.org/10.3390/biomedicines9030319>
- 346 2. Kshetry, V. R., Hsieh, J. K., Ostrom, Q. T., Kruchko, C., Benzel, E. C., & Barnholtz-  
347 Sloan, J. S. (2015). Descriptive Epidemiology of Spinal Meningiomas in the United  
348 States. *Spine*, 40(15), E886-9. <https://doi.org/10.1097/BRS.0000000000000974>
- 349 3. Maiti, T. K., Bir, S. C., Patra, D. P., Kalakoti, P., Guthikonda, B., & Nanda, A. (2016).  
350 Spinal meningiomas: clinicoradiological factors predicting recurrence and functional  
351 outcome. *Neurosurgical Focus*, 41(2), E6. <https://doi.org/10.3171/2016.5.FOCUS16163>
- 352 4. Pettersson-Segerlind, J., Fletcher-Sandersjö, A., Tatter, C., Burström, G., Persson, O.,  
353 Förander, P., Mathiesen, T., Bartek, J., Edström, E., & Elmi-Terander, A. (2021). Long-

- 1  
2  
3 354 Term Follow-Up and Predictors of Functional Outcome after Surgery for Spinal  
4 355 Meningiomas: A Population-Based Cohort Study. *Cancers* 2021, Vol. 13, Page 3244,  
5 356 13(13), 3244. <https://doi.org/10.3390/CANCERS13133244>
- 6  
7 357 5. Westwick, H. J., & Shamji, M. F. (2015). Effects of sex on the incidence and prognosis of  
8 358 spinal meningiomas: a Surveillance, Epidemiology, and End Results study. *Journal of*  
9 359 *Neurosurgery: Spine*, 23(3), 368–373. <https://doi.org/10.3171/2014.12.SPINE14974>
- 10  
11 360 6. Hua, L., Zhu, H., Deng, J., Tian, M., Jiang, X., Tang, H., Luan, S., Wakimoto, H., Xie, Q.,  
12 361 & Gong, Y. (2018). Clinical and prognostic features of spinal meningioma: a thorough  
13 362 analysis from a single neurosurgical center. *Journal of Neuro-Oncology*, 140(3), 639–  
14 363 647. <https://doi.org/10.1007/S11060-018-2993-3/TABLES/4>
- 15  
16 364 7. Kwee, L. E., Harhangi, B. S., Ponne, G. A., Kros, J. M., Dirven, C. M. F., & Dammers, R.  
17 365 (2020). Spinal meningiomas: Treatment outcome and long-term follow-up. *Clinical*  
18 366 *Neurology and Neurosurgery*, 198, 106238.  
19 367 <https://doi.org/10.1016/J.CLINEURO.2020.106238>
- 20  
21 368 8. Duong, L. M., McCarthy, B. J., McLendon, R. E., Dolecek, T. A., Kruchko, C., Douglas,  
22 369 L. L., & Ajani, U. A. (2012). Descriptive epidemiology of malignant and nonmalignant  
23 370 primary spinal cord, spinal meninges, and cauda equina tumors, United States, 2004–  
24 371 2007. *Cancer*, 118(17), 4220–4227. <https://doi.org/10.1002/CNCR.27390>
- 25  
26 372 9. Evans, D. G. R., Sainio, M., & Baser, M. E. (2000). Neurofibromatosis type 2. *Journal of*  
27 373 *Medical Genetics*, 37(12), 897. <https://doi.org/10.1136/JMG.37.12.897>
- 28  
29 374 10. Karsy, M., Guan, J., Sivakumar, W., Neil, J. A., Schmidt, M. H., & Mahan, M. A. (2015).  
30 375 The genetic basis of intradural spinal tumors and its impact on clinical treatment.  
31 376 *Neurosurgical Focus*, 39(2), E3. <https://doi.org/10.3171/2015.5.FOCUS15143>
- 32  
33 377 11. Arslantas, A., Artan, S., Öner, Ü., Durmaz, R., Müslümanoğlu, H., Atasoy, M. A.,  
34 378 Başaran, N., & Tel, E. (2003). Detection of Chromosomal Imbalances in Spinal  
35 379 Meningiomas by Comparative Genomic Hybridization. *Neurologia Medico-Chirurgica*,  
36 380 43(1), 12–19. <https://doi.org/10.2176/NMC.43.12>
- 37  
38 381 12. Pawloski, J. A., Fadel, H. A., Huang, Y.-W., Lee, I. Y., Pawloski, C. ;, Fadel, J. A. ;,  
39 382 Huang, H. A. ;, Lee, Y.-W. ;, Genomic, I. Y., & Baldi, A. (2021). Genomic Biomarkers  
40 383 of Meningioma: A Focused Review. *International Journal of Molecular Sciences* 2021,  
41 384 Vol. 22, Page 10222, 22(19), 10222. <https://doi.org/10.3390/IJMS221910222>
- 42  
43 385 13. Cohen-Gadol, A. A., Zikel, O. M., Koch, C. A., Scheithauer, B. W., & Krauss, W. E.  
44 386 (2003). Spinal meningiomas in patients younger than 50 years of age: a 21-year  
45 387 experience. *Journal of Neurosurgery: Spine*, 98(3), 258–263.  
46 388 <https://doi.org/10.3171/SPI.2003.98.3.0258>
- 47  
48 389 14. Maiuri, F., Mariniello, G., de Divitiis, O., Esposito, F., Guadagno, E., Teodonno, G.,  
49 390 Barbato, M., & del Basso De Caro, M. (2021). Progesterone Receptor Expression in  
50 391 Meningiomas: Pathological and Prognostic Implications. *Frontiers in Oncology*, 11,  
51 392 2585. <https://doi.org/10.3389/FONC.2021.611218/BIBTEX>
- 52  
53 393 15. Antolínez Ayala, V. E., García Arias, M. D., Bautista Vargas, S. E., Báez Cárdenas, L.  
54 394 M., & Castellanos Peñaranda, C. (2021). Paraplegia due to spinal meningioma during  
55 395 the third trimester of pregnancy: case report and literature review. *Spinal Cord Series*  
56 396 *and Cases* 2021 7:1, 7(1), 1–5. <https://doi.org/10.1038/s41394-020-00368-0>
- 57  
58 397 16. Hortobágyi, T., Bencze, J., Murnyák, B., Kouhsari, M. C., Bognár, L., & Marko-Varga,  
59 398 G. (2017). Pathophysiology of meningioma growth in pregnancy. *Open Medicine*  
60 399 (Poland), 12(1), 195–200. <https://doi.org/10.1515/MED-2017-0029/MACHINEREADABLECITATION/RIS>
- 401  
402 17. Pettersson-Segerlind, J., Mathiesen, T., Elmi-Terander, A., Edström, E., Talbäck, M.,  
Feychting, M., & Tettamanti, G. (2021). The risk of developing a meningioma during

- 1  
2  
3 403 and after pregnancy. *Scientific Reports* 2021 11:1, 11(1), 1–8.  
4 404 <https://doi.org/10.1038/s41598-021-88742-2>
- 5 405 18. Abul-Kasim, K., Thurnher, M. M., McKeever, P., & Sundgren, P. C. (2008). Intradural  
6 406 spinal tumors: current classification and MRI features. *Neuroradiology*, 50(4), 301–314.  
7 407 <https://doi.org/10.1007/S00234-007-0345-7>
- 8 408 19. Watts, J., Box, G., Galvin, A., Brotchie, P., Trost, N., & Sutherland, T. (2014). Magnetic  
9 409 resonance imaging of meningiomas: A pictorial review. *Insights into Imaging*, 5(1),  
10 410 113–122. <https://doi.org/10.1007/S13244-013-0302-4/FIGURES/21>
- 11 411 20. Tsuda, K., Akutsu, H., Yamamoto, T., Nakai, K., Ishikawa, E., & Matsumura, A. (2014).  
12 412 Is Simpson Grade I Removal Necessary in All Cases of Spinal Meningioma?  
13 413 Assessment of Postoperative Recurrence during Long-Term Follow-up. *Neurologia*  
14 414 *Medico-Chirurgica*, 54(11), 907–913. <https://doi.org/10.2176/NMC.OA.2013-0311>
- 15 415 21. Kim, C. H., Chung, C. K., Lee, S. H., Jahng, T. A., Hyun, S. J., Kim, K. J., Yoon, S. H.,  
16 416 Kim, E. S., Eoh, W., Kim, H. J., Kim, K. T., Sung, J. K., & Choi, Y. (2016). Long-term  
17 417 recurrence rates after the removal of spinal meningiomas in relation to Simpson grades.  
18 418 *European Spine Journal*, 25(12), 4025–4032. [https://doi.org/10.1007/S00586-015-4306-](https://doi.org/10.1007/S00586-015-4306-2/FIGURES/2)  
19 419 [2/FIGURES/2](https://doi.org/10.1007/S00586-015-4306-2/FIGURES/2)
- 20 420 22. Voldřich, R., Netuka, D., & Beneš, V. (2020). Spinal meningiomas: is Simpson grade II  
21 421 resection radical enough? *Acta Neurochirurgica*, 162(6), 1401–1408.  
22 422 <https://doi.org/10.1007/S00701-020-04280-2/FIGURES/2>
- 23 423 23. Nakamura, M., Tsuji, O., Fujiyoshi, K., Hosogane, N., Watanabe, K., Tsuji, T., Ishii, K.,  
24 424 Toyama, Y., Chiba, K., & Matsumoto, M. (2012). Long-term surgical outcomes of  
25 425 spinal meningiomas. *Spine*, 37(10). <https://doi.org/10.1097/BRS.0B013E31824167F1>
- 26 426 24. Tatter, C., Fletcher-Sandersjö, A., Persson, O., Burström, G., Grane, P., Edström, E., &  
27 427 Elmi-Terander, A. (2020). Incidence and predictors of kyphotic deformity following  
28 428 resection of cervical intradural tumors in adults: a population-based cohort study. *Acta*  
29 429 *Neurochirurgica*, 162(11), 2905–2913. [https://doi.org/10.1007/S00701-020-04416-](https://doi.org/10.1007/S00701-020-04416-4/FIGURES/5)  
30 430 [4/FIGURES/5](https://doi.org/10.1007/S00701-020-04416-4/FIGURES/5)
- 31 431 25. Yoon, S. H., Chung, C. K., & Jahng, T. A. (2007). Surgical Outcome of Spinal Canal  
32 432 Meningiomas. *Journal of Korean Neurosurgical Society*, 42(4), 300–304.  
33 433 <https://doi.org/10.3340/JKNS.2007.42.4.300>
- 34 434 26. Westwick, H. J., Yuh, S. J., & Shamji, M. F. (2015). Complication Avoidance in the  
35 435 Resection of Spinal Meningiomas. *World Neurosurgery*, 83(4), 627–634.  
36 436 <https://doi.org/10.1016/J.WNEU.2014.12.015>
- 37 437 27. Bydon, M., & Gokaslan, Z. L. (2015). Spinal Meningioma Resection. *World*  
38 438 *Neurosurgery*, 83(6), 1032–1033. <https://doi.org/10.1016/J.WNEU.2015.01.049>
- 39 439 28. Frati, A., Pesce, A., Toccaceli, G., Frascetti, F., Caruso, R., & Raco, A. (2019). Spinal  
40 440 Meningiomas Prognostic Evaluation Score (SPES): predicting the neurological  
41 441 outcomes in spinal meningioma surgery. *Neurosurgical Review*, 42(1), 115–125.  
42 442 <https://doi.org/10.1007/S10143-018-0961-1/FIGURES/4>
- 43 443 29. Newman, W. C., Berry-Candelario, J., Villavieja, J., Reiner, A. S., Bilsky, M. H., Laufer,  
44 444 I., & Barzilai, O. (2021). Improvement in Quality of Life Following Surgical Resection  
45 445 of Benign Intradural Extramedullary Tumors: A Prospective Evaluation of Patient-  
46 446 Reported Outcomes. *Neurosurgery*, 88(5), 989–995.  
47 447 <https://doi.org/10.1093/NEUROS/NYAA561>
- 48 448 30. Viereck, M. J., Ghobrial, G. M., Beygi, S., & Harrop, J. S. (2016). Improved patient  
49 449 quality of life following intradural extramedullary spinal tumor resection. *Journal of*  
50 450 *Neurosurgery: Spine*, 25(5), 640–645. <https://doi.org/10.3171/2016.4.SPINE151149>
- 51 451 31. Pettersson-Segerlind, J., Vogelsang, A.-C. von, Fletcher-Sandersjö, A., Tatter, C.,  
52 452 Mathiesen, T., Edström, E., & Elmi-Terander, A. (2021). Health-Related Quality of Life

- 1  
2  
3 453 and Return to Work after Surgery for Spinal Meningioma: A Population-Based Cohort  
4 454 Study. *Cancers* 2021, Vol. 13, Page 6371, 13(24), 6371.  
5 455 <https://doi.org/10.3390/CANCERS13246371>
- 6 456 32. Yolcu, Y. U., Goyal, A., Alvi, M. A., Moinuddin, F. M., & Bydon, M. (2019). Trends in  
7 457 the utilization of radiotherapy for spinal meningiomas: insights from the 2004–2015  
8 458 National Cancer Database. *Neurosurgical Focus*, 46(6), E6.  
9 459 <https://doi.org/10.3171/2019.3.FOCUS1969>
- 10 460 33. Cooke, A., Smith, D., & Booth, A. (2012). Beyond PICO: The SPIDER tool for  
11 461 qualitative evidence synthesis. *Qualitative Health Research*, 22(10), 1435–1443.  
12 462 <https://doi.org/10.1177/1049732312452938>
- 13 463 34. Moher, D., Shamseer, L., Clarke, M., Ghersi, D., Liberati, A., Petticrew, M., Shekelle, P.,  
14 464 Stewart, L. A., Estarli, M., Barrera, E. S. A., Martínez-Rodríguez, R., Baladia, E.,  
15 465 Agüero, S. D., Camacho, S., Buhring, K., Herrero-López, A., Gil-González, D. M.,  
16 466 Altman, D. G., Booth, A., ... Whitlock, E. (2016). Preferred reporting items for  
17 467 systematic review and meta-analysis protocols (PRISMA-P) 2015 statement. *Revista*  
18 468 *Espanola de Nutricion Humana y Dietetica*, 20(2), 148–160.  
19 469 <https://doi.org/10.1186/2046-4053-4-1/TABLES/4>
- 20 470 35. Roy Rosenzweig Center for History and New Media. (2016) Zotero [Computer software].  
21 471 Retrieved from [www.zotero.org/download](http://www.zotero.org/download). (n.d.).
- 22 472 36. Ouzzani, M., Hammady, H., Fedorowicz, Z., & Elmagarmid, A. (2016). Rayyan—a web  
23 473 and mobile app for systematic reviews. *Systematic Reviews*, 5(1), 210.  
24 474 <https://doi.org/10.1186/s13643-016-0384-4>
- 25 475 37. OCEBM Levels of Evidence Working Group\*. “The Oxford 2011 Levels of Evidence”.  
26 476 Oxford Centre for Evidence-Based Medicine.  
27 477 <http://www.cebm.net/index.aspx?o=5653> \* OCEBM Table of Evidence Working Group  
28 478 = Jeremy Howick, Iain Chalmers (James Lind Library), Paul Glasziou, Trish  
29 479 Greenhalgh, Carl Heneghan, Alessandro Liberati, Ivan Moschetti, Bob Phillips, Hazel  
30 480 Thornton, Olive Goddard and Mary Hodgkinson. (n.d.).
- 31 481 38. Wright, J. G., Swiontkowski, M. F., & Heckman, J. D. (2003). Introducing levels of  
32 482 evidence to the journal. *The Journal of Bone and Joint Surgery. American Volume*,  
33 483 85(1), 1–3.
- 34 484 39. Anderson, K. K., Tetreault, L., Shamji, M. F., Singh, A., Vukas, R. R., Harrop, J. S.,  
35 485 Fehlings, M. G., Vaccaro, A. R., Hilibrand, A. S., & Arnold, P. M. (2015). Optimal  
36 486 Timing of Surgical Decompression for Acute Traumatic Central Cord Syndrome.  
37 487 *Neurosurgery*, 77, S15–S32. <https://doi.org/10.1227/NEU.0000000000000946>
- 38 488 40. Ma, L. L., Wang, Y. Y., Yang, Z. H., Huang, D., Weng, H., & Zeng, X. T. (2020).  
39 489 Methodological quality (risk of bias) assessment tools for primary and secondary  
40 490 medical studies: What are they and which is better? *Military Medical Research*, 7(1), 1–  
41 491 11. <https://doi.org/10.1186/S40779-020-00238-8/TABLES/1>
- 42 492 41. Schünemann H, Brożek J, Guyatt G, Oxman A, editors. *GRADE handbook for grading*  
43 493 *quality of evidence and strength of recommendations. Updated October 2013. The*  
44 494 *GRADE Working Group, 2013. Available from [guidelinedevelopment.org/handbook](http://guidelinedevelopment.org/handbook).*  
45 495 (n.d.).
- 46 496 42. *GRADEpro GDT: GRADEpro Guideline Development Tool [Software]. McMaster*  
47 497 *University, 2020 (developed by Evidence Prime, Inc.). Available from [grade.pro](http://grade.pro).*  
48 498 (n.d.).
- 49 499 43. Reid, E. K., Tejani, A. M., Huan, L. N., Egan, G., O’Sullivan, C., Mayhew, A. D., &  
50 500 Kabir, M. (2015). Managing the incidence of selective reporting bias: A survey of  
51 501 Cochrane review groups. *Systematic Reviews*, 4(1), 1–8. [https://doi.org/10.1186/S13643-](https://doi.org/10.1186/S13643-015-0070-Y/FIGURES/3)  
52 502 [015-0070-Y/FIGURES/3](https://doi.org/10.1186/S13643-015-0070-Y/FIGURES/3)

- 1  
2  
3 503 44. Weber, C., Gulati, S., Jakola, A. S., Habiba, S., Nygaard, Ø. P., Johannesen, T. B., &  
4 504 Solheim, O. (2014). Incidence rates and surgery of primary intraspinal tumors in the era  
5 505 of modern neuroimaging: a national population-based study. *Spine*, 39(16).  
6 506 <https://doi.org/10.1097/BRS.0000000000000412>
- 7 507 45. Sandalcioğlu, I. E., Hunold, A., Müller, O., Bassiouni, H., Stolke, D., & Asgari, S.  
8 508 (2008). Spinal meningiomas: Critical review of 131 surgically treated patients.  
9 509 *European Spine Journal*, 17(8), 1035–1041. <https://doi.org/10.1007/S00586-008-0685->  
10 510 [Y/TABLES/4](https://doi.org/10.1007/S00586-008-0685-Y/TABLES/4)
- 11 511 46. Hohenberger, C., Gugg, C., Schmidt, N. O., Zeman, F., & Schebesch, K. M. (2020).  
12 512 Functional outcome after surgical treatment of spinal meningioma. *Journal of Clinical*  
13 513 *Neuroscience*, 77, 62–66. <https://doi.org/10.1016/J.JOCN.2020.05.042>
- 14 514 47. Morandi, X., Haegelen, C., Riffaud, L., Amlashi, S., Adn, M., & Brassier, G. (2004).  
15 515 Results in the operative treatment of elderly patients with spinal meningiomas. *Spine*,  
16 516 29(19), 2191–2194. <https://doi.org/10.1097/01.BRS.0000141173.79572.40>
- 17 517 48. Arima, H., Takami, T., Yamagata, T., Naito, K., Abe, J., Shimokawa, N., & Ohata, K.  
18 518 (2014). Surgical management of spinal meningiomas: A retrospective case analysis  
19 519 based on preoperative surgical grade. *Surgical Neurology International*, 5(Suppl 7),  
20 520 S333. <https://doi.org/10.4103/2152-7806.139642>
- 21 521 49. Sacko, O., Haegelen, C., Mendes, V., Brenner, A., Sesay, M., Brauge, D., Lagarrigue, J.,  
22 522 Loiseau, H., & Roux, F. E. (2009). SPINAL MENINGIOMA SURGERY IN  
23 523 ELDERLY PATIENTS WITH PARAPLEGIA OR SEVERE PARAPARESIS A  
24 524 MULTICENTER STUDY. *Neurosurgery*, 64(3), 503–510.  
25 525 <https://doi.org/10.1227/01.NEU.0000338427.44471.1D>
- 26 526 50. Haegelen, C., Morandi, X., Riffaud, L., Amlashi, S. F. A., Leray, E., & Brassier, G.  
27 527 (2005). Results of spinal meningioma surgery in patients with severe preoperative  
28 528 neurological deficits. *European Spine Journal*, 14(5), 440–444.  
29 529 <https://doi.org/10.1007/S00586-004-0809-Y/TABLES/3>
- 30 530 51. Schaller, B. (2005). Spinal Meningioma: Relationship Between Histological Subtypes and  
31 531 Surgical Outcome? *Journal of Neuro-Oncology* 2005 75:2, 75(2), 157–161.  
32 532 <https://doi.org/10.1007/S11060-005-1469-4>
- 33 533 52. Setzer, M., Vatter, H., Marquardt, G., Seifert, V., & Vrionis, F. D. (2007). Management  
34 534 of spinal meningiomas: surgical results and a review of the literature. *Neurosurgical*  
35 535 *Focus*, 23(4), E14. <https://doi.org/10.3171/FOC-07/10/E14>
- 36 536 53. Gilard, V., Goia, A., Ferracci, F. X., Marguet, F., Magne, N., Langlois, O., Perez, A., &  
37 537 Derrey, S. (2018). Spinal meningioma and factors predictive of post-operative  
38 538 deterioration. *Journal of Neuro-Oncology*, 140(1), 49–54.  
39 539 <https://doi.org/10.1007/S11060-018-2929-Y/TABLES/4>
- 40 540 54. Gezen, F., Kahraman, S., Çanakçı, Z., & Bedük, A. (2000). Review of 36 Cases of Spinal  
41 541 Cord Meningioma. *Spine*, 25(6), 727–731. <https://doi.org/10.1097/00007632->  
42 542 [200003150-00013](https://doi.org/10.1097/00007632-200003150-00013)
- 43 543 55. Bayoumi, A. B., Laviv, Y., Karaali, C. N., Ertlav, K., Kepoglu, U., Toktas, Z. O., Konya,  
44 544 D., & Kasper, E. M. (2020). Spinal meningiomas: 61 cases with predictors of early  
45 545 postoperative surgical outcomes. *Journal of Neurosurgical Sciences*, 64(5), 446–451.  
46 546 <https://doi.org/10.23736/S0390-5616.17.04102-9>
- 47 547 56. Raco, A., Pesce, A., Toccaceli, G., Domenicucci, M., Miscusi, M., & Delfini, R. (2017).  
48 548 Factors leading to a poor functional outcome in spinal meningioma surgery: Remarks on  
49 549 173 cases. *Neurosurgery*, 80(4), 602–609. <https://doi.org/10.1093/NEUROS/NYW092>
- 50 550 57. Klekamp, J., & Samii, M. (1999). Surgical results for spinal meningiomas. *Surgical*  
51 551 *Neurology*, 52(6), 552–562. [https://doi.org/10.1016/S0090-3019\(99\)00153-6](https://doi.org/10.1016/S0090-3019(99)00153-6)

- 1  
2  
3 552 58. Edwards, T. B. (2014). What is the value of a systematic review? *Journal of Shoulder and*  
4 553 *Elbow Surgery*, 23(1), 1–2. <https://doi.org/10.1016/J.JSE.2013.09.001>  
5  
6 554 59. Lasserson TJ, Thomas J, Higgins JPT. Chapter 1: Starting a review. In: Higgins JPT,  
7 555 Thomas J, Chandler J, Cumpston M, Li T, Page MJ, Welch VA (editors). *Cochrane*  
8 556 *Handbook for Systematic Reviews of Interventions version 6.2 (updated February 2021).*  
9 557 *Cochrane, 2021. Available from [www.training.cochrane.org/handbook](http://www.training.cochrane.org/handbook). (n.d.).*  
10 558

## 559 **Supplementary information**

---

- 14 560 Supplementary file 1: PRISMA-P 2015 Checklist.  
15 561 Supplementary file 2: Search strategy for Web of Science.  
16  
17  
18  
19  
20  
21  
22  
23  
24  
25  
26  
27  
28  
29  
30  
31  
32  
33  
34  
35  
36  
37  
38  
39  
40  
41  
42  
43  
44  
45  
46  
47  
48  
49  
50  
51  
52  
53  
54  
55  
56  
57  
58  
59  
60



# Reporting checklist for protocol of a systematic review and meta analysis.

Based on the PRISMA-P guidelines.

Reference: Moher D, Shamseer L, Clarke M, Ghersi D, Liberati A, Petticrew M, Shekelle P, Stewart LA. Preferred Reporting Items for Systematic Review and Meta-Analysis Protocols (PRISMA-P) 2015 statement. *Syst Rev*. 2015;4(1):1.

|                     | Reporting Item                                                                                                                                                                                          | Page Number                                                 |
|---------------------|---------------------------------------------------------------------------------------------------------------------------------------------------------------------------------------------------------|-------------------------------------------------------------|
| <b>Title</b>        |                                                                                                                                                                                                         |                                                             |
| Identification      | <a href="#">#1a</a> Identify the report as a protocol of a systematic review                                                                                                                            | 1                                                           |
| Update              | <a href="#">#1b</a> If the protocol is for an update of a previous systematic review, identify as such                                                                                                  | n/a                                                         |
| <b>Registration</b> |                                                                                                                                                                                                         |                                                             |
|                     | <a href="#">#2</a> If registered, provide the name of the registry (such as PROSPERO) and registration number                                                                                           | n/a (this protocol is planned for registration on PROSPERO) |
| <b>Authors</b>      |                                                                                                                                                                                                         |                                                             |
| Contact             | <a href="#">#3a</a> Provide name, institutional affiliation, e-mail address of all protocol authors; provide physical mailing address of corresponding author                                           | 1                                                           |
| Contribution        | <a href="#">#3b</a> Describe contributions of protocol authors and identify the guarantor of the review                                                                                                 | 9                                                           |
| <b>Amendments</b>   |                                                                                                                                                                                                         |                                                             |
|                     | <a href="#">#4</a> If the protocol represents an amendment of a previously completed or published protocol, identify as such and list changes; otherwise, state plan for documenting important protocol | n/a                                                         |

amendments

## Support

|    |                           |                     |                                                                                                      |
|----|---------------------------|---------------------|------------------------------------------------------------------------------------------------------|
| 1  |                           |                     |                                                                                                      |
| 2  |                           |                     |                                                                                                      |
| 3  | <b>Support</b>            |                     |                                                                                                      |
| 4  |                           |                     |                                                                                                      |
| 5  | Sources                   | <a href="#">#5a</a> | Indicate sources of financial or other support for the review                                        |
| 6  |                           |                     | n/a                                                                                                  |
| 7  |                           |                     |                                                                                                      |
| 8  |                           |                     |                                                                                                      |
| 9  | Sponsor                   | <a href="#">#5b</a> | Provide name for the review funder and / or sponsor                                                  |
| 10 |                           |                     | n/a                                                                                                  |
| 11 |                           |                     |                                                                                                      |
| 12 |                           |                     |                                                                                                      |
| 13 | Role of sponsor or funder | <a href="#">#5c</a> | Describe roles of funder(s), sponsor(s), and / or institution(s), if any, in developing the protocol |
| 14 |                           |                     | n/a                                                                                                  |
| 15 |                           |                     |                                                                                                      |

## Introduction

|    |                     |                    |                                                                                                                                                          |
|----|---------------------|--------------------|----------------------------------------------------------------------------------------------------------------------------------------------------------|
| 16 |                     |                    |                                                                                                                                                          |
| 17 | <b>Introduction</b> |                    |                                                                                                                                                          |
| 18 |                     |                    |                                                                                                                                                          |
| 19 | Rationale           | <a href="#">#6</a> | Describe the rationale for the review in the context of what is already known                                                                            |
| 20 |                     |                    | 2, 4                                                                                                                                                     |
| 21 |                     |                    |                                                                                                                                                          |
| 22 |                     |                    |                                                                                                                                                          |
| 23 | Objectives          | <a href="#">#7</a> | Provide an explicit statement of the question(s) the review will address with reference to participants, interventions, comparators, and outcomes (PICO) |
| 24 |                     |                    | 4                                                                                                                                                        |
| 25 |                     |                    |                                                                                                                                                          |
| 26 |                     |                    |                                                                                                                                                          |
| 27 |                     |                    |                                                                                                                                                          |
| 28 |                     |                    |                                                                                                                                                          |
| 29 |                     |                    |                                                                                                                                                          |

## Methods

|    |                                 |                      |                                                                                                                                                                                                                               |
|----|---------------------------------|----------------------|-------------------------------------------------------------------------------------------------------------------------------------------------------------------------------------------------------------------------------|
| 30 |                                 |                      |                                                                                                                                                                                                                               |
| 31 | <b>Methods</b>                  |                      |                                                                                                                                                                                                                               |
| 32 |                                 |                      |                                                                                                                                                                                                                               |
| 33 | Eligibility criteria            | <a href="#">#8</a>   | Specify the study characteristics (such as PICO, study design, setting, time frame) and report characteristics (such as years considered, language, publication status) to be used as criteria for eligibility for the review |
| 34 |                                 |                      | 4, 5                                                                                                                                                                                                                          |
| 35 |                                 |                      |                                                                                                                                                                                                                               |
| 36 |                                 |                      |                                                                                                                                                                                                                               |
| 37 |                                 |                      |                                                                                                                                                                                                                               |
| 38 |                                 |                      |                                                                                                                                                                                                                               |
| 39 |                                 |                      |                                                                                                                                                                                                                               |
| 40 |                                 |                      |                                                                                                                                                                                                                               |
| 41 | Information sources             | <a href="#">#9</a>   | Describe all intended information sources (such as electronic databases, contact with study authors, trial registers or other grey literature sources) with planned dates of coverage                                         |
| 42 |                                 |                      | 5                                                                                                                                                                                                                             |
| 43 |                                 |                      |                                                                                                                                                                                                                               |
| 44 |                                 |                      |                                                                                                                                                                                                                               |
| 45 |                                 |                      |                                                                                                                                                                                                                               |
| 46 |                                 |                      |                                                                                                                                                                                                                               |
| 47 |                                 |                      |                                                                                                                                                                                                                               |
| 48 | Search strategy                 | <a href="#">#10</a>  | Present draft of search strategy to be used for at least one electronic database, including planned limits, such that it could be repeated                                                                                    |
| 49 |                                 |                      | 5                                                                                                                                                                                                                             |
| 50 |                                 |                      |                                                                                                                                                                                                                               |
| 51 |                                 |                      |                                                                                                                                                                                                                               |
| 52 |                                 |                      |                                                                                                                                                                                                                               |
| 53 |                                 |                      |                                                                                                                                                                                                                               |
| 54 | Study records - data management | <a href="#">#11a</a> | Describe the mechanism(s) that will be used to manage records and data throughout the review                                                                                                                                  |
| 55 |                                 |                      | 5, 6                                                                                                                                                                                                                          |
| 56 |                                 |                      |                                                                                                                                                                                                                               |
| 57 |                                 |                      |                                                                                                                                                                                                                               |
| 58 |                                 |                      |                                                                                                                                                                                                                               |
| 59 |                                 |                      |                                                                                                                                                                                                                               |
| 60 |                                 |                      |                                                                                                                                                                                                                               |

|    |                    |                      |                                                             |                          |
|----|--------------------|----------------------|-------------------------------------------------------------|--------------------------|
| 1  | Study records -    | <a href="#">#11b</a> | State the process that will be used for selecting           | 5                        |
| 2  | selection process  |                      | studies (such as two independent reviewers)                 |                          |
| 3  |                    |                      | through each phase of the review (that is,                  |                          |
| 4  |                    |                      | screening, eligibility and inclusion in meta-               |                          |
| 5  |                    |                      | analysis)                                                   |                          |
| 6  |                    |                      |                                                             |                          |
| 7  |                    |                      |                                                             |                          |
| 8  |                    |                      |                                                             |                          |
| 9  |                    |                      |                                                             |                          |
| 10 | Study records -    | <a href="#">#11c</a> | Describe planned method of extracting data                  | 6                        |
| 11 | data collection    |                      | from reports (such as piloting forms, done                  |                          |
| 12 | process            |                      | independently, in duplicate), any processes for             |                          |
| 13 |                    |                      | obtaining and confirming data from investigators            |                          |
| 14 |                    |                      |                                                             |                          |
| 15 |                    |                      |                                                             |                          |
| 16 |                    |                      |                                                             |                          |
| 17 | Data items         | <a href="#">#12</a>  | List and define all variables for which data will           | 6                        |
| 18 |                    |                      | be sought (such as PICO items, funding                      |                          |
| 19 |                    |                      | sources), any pre-planned data assumptions                  |                          |
| 20 |                    |                      | and simplifications                                         |                          |
| 21 |                    |                      |                                                             |                          |
| 22 |                    |                      |                                                             |                          |
| 23 |                    |                      |                                                             |                          |
| 24 | Outcomes and       | <a href="#">#13</a>  | List and define all outcomes for which data will            | 7                        |
| 25 | prioritization     |                      | be sought, including prioritization of main and             |                          |
| 26 |                    |                      | additional outcomes, with rationale                         |                          |
| 27 |                    |                      |                                                             |                          |
| 28 |                    |                      |                                                             |                          |
| 29 | Risk of bias in    | <a href="#">#14</a>  | Describe anticipated methods for assessing risk             | 6                        |
| 30 | individual studies |                      | of bias of individual studies, including whether            |                          |
| 31 |                    |                      | this will be done at the outcome or study level,            |                          |
| 32 |                    |                      | or both; state how this information will be used            |                          |
| 33 |                    |                      | in data synthesis                                           |                          |
| 34 |                    |                      |                                                             |                          |
| 35 |                    |                      |                                                             |                          |
| 36 |                    |                      |                                                             |                          |
| 37 |                    |                      |                                                             |                          |
| 38 | Data synthesis     | <a href="#">#15a</a> | Describe criteria under which study data will be            | n/a (only qualitative    |
| 39 |                    |                      | quantitatively synthesised                                  | synthesis will be sought |
| 40 |                    |                      |                                                             | due to expected          |
| 41 |                    |                      |                                                             | heterogeneity)           |
| 42 |                    |                      |                                                             |                          |
| 43 |                    |                      |                                                             |                          |
| 44 |                    |                      |                                                             |                          |
| 45 | Data synthesis     | <a href="#">#15b</a> | If data are appropriate for quantitative synthesis,         | n/a (qualitative only)   |
| 46 |                    |                      | describe planned summary measures, methods                  |                          |
| 47 |                    |                      | of handling data and methods of combining data              |                          |
| 48 |                    |                      | from studies, including any planned exploration             |                          |
| 49 |                    |                      | of consistency (such as I <sup>2</sup> , Kendall's $\tau$ ) |                          |
| 50 |                    |                      |                                                             |                          |
| 51 |                    |                      |                                                             |                          |
| 52 |                    |                      |                                                             |                          |
| 53 |                    |                      |                                                             |                          |
| 54 | Data synthesis     | <a href="#">#15c</a> | Describe any proposed additional analyses                   | n/a                      |
| 55 |                    |                      | (such as sensitivity or subgroup analyses, meta-            |                          |
| 56 |                    |                      | regression)                                                 |                          |
| 57 |                    |                      |                                                             |                          |
| 58 |                    |                      |                                                             |                          |
| 59 |                    |                      |                                                             |                          |
| 60 |                    |                      |                                                             |                          |

|    |                |                      |                                                                                                                               |      |
|----|----------------|----------------------|-------------------------------------------------------------------------------------------------------------------------------|------|
| 1  | Data synthesis | <a href="#">#15d</a> | If quantitative synthesis is not appropriate, describe the type of summary planned                                            | 7    |
| 2  |                |                      |                                                                                                                               |      |
| 3  |                |                      |                                                                                                                               |      |
| 4  |                |                      |                                                                                                                               |      |
| 5  | Meta-bias(es)  | <a href="#">#16</a>  | Specify any planned assessment of meta-bias(es) (such as publication bias across studies, selective reporting within studies) | 6    |
| 6  |                |                      |                                                                                                                               |      |
| 7  |                |                      |                                                                                                                               |      |
| 8  |                |                      |                                                                                                                               |      |
| 9  |                |                      |                                                                                                                               |      |
| 10 | Confidence in  | <a href="#">#17</a>  | Describe how the strength of the body of evidence will be assessed (such as GRADE)                                            | 6, 7 |
| 11 | cumulative     |                      |                                                                                                                               |      |
| 12 | evidence       |                      |                                                                                                                               |      |
| 13 |                |                      |                                                                                                                               |      |
| 14 |                |                      |                                                                                                                               |      |
| 15 |                |                      |                                                                                                                               |      |
| 16 |                |                      |                                                                                                                               |      |
| 17 |                |                      |                                                                                                                               |      |

18 The PRISMA-P elaboration and explanation paper is distributed under the terms of the Creative  
19 Commons Attribution License CC-BY. This checklist was completed on 29. January 2022 using  
20 <https://www.goodreports.org/>, a tool made by the [EQUATOR Network](#) in collaboration with  
21 [Penelope.ai](#)  
22  
23  
24  
25  
26  
27  
28  
29  
30  
31  
32  
33  
34  
35  
36  
37  
38  
39  
40  
41  
42  
43  
44  
45  
46  
47  
48  
49  
50  
51  
52  
53  
54  
55  
56  
57  
58  
59  
60

## Supplementary file 2: Draft search strategy inclusive to the Web of Science database

|     |                                                                                |
|-----|--------------------------------------------------------------------------------|
| #1  | Spinal AND meningioma* (title)                                                 |
| #2  | Case report (title)                                                            |
| #3  | #1 NOT #2                                                                      |
| #4  | "spinal meningioma" (All fields)                                               |
| #5  | "case report" (Topic)                                                          |
| #6  | #4 NOT #5                                                                      |
| #7  | Search #3 OR #6                                                                |
| #8  | 2000-2500 (Year Published)                                                     |
| #9  | English (Language)                                                             |
| #10 | Veterinary sciences (Exclude – Web of Science Categories)                      |
| #11 | Editorial Materials or Letters or Meeting Abstracts (Exclude – Document Types) |
| #12 | Search #7 AND #8 AND #9 NOT #10 NOT #11                                        |

# BMJ Open

## Current knowledge on spinal meningiomas: a systematic review protocol

|                                 |                                                                                                                                                                                                                                                                                                                                                                                                                                                                                                                                                                                                                                                                                                                                          |
|---------------------------------|------------------------------------------------------------------------------------------------------------------------------------------------------------------------------------------------------------------------------------------------------------------------------------------------------------------------------------------------------------------------------------------------------------------------------------------------------------------------------------------------------------------------------------------------------------------------------------------------------------------------------------------------------------------------------------------------------------------------------------------|
| Journal:                        | <i>BMJ Open</i>                                                                                                                                                                                                                                                                                                                                                                                                                                                                                                                                                                                                                                                                                                                          |
| Manuscript ID                   | bmjopen-2022-061614.R1                                                                                                                                                                                                                                                                                                                                                                                                                                                                                                                                                                                                                                                                                                                   |
| Article Type:                   | Protocol                                                                                                                                                                                                                                                                                                                                                                                                                                                                                                                                                                                                                                                                                                                                 |
| Date Submitted by the Author:   | 15-May-2022                                                                                                                                                                                                                                                                                                                                                                                                                                                                                                                                                                                                                                                                                                                              |
| Complete List of Authors:       | El-Hajj, Victor Gabriel; Karolinska University Hospital, Department of Neurosurgery; Karolinska Institute, Department of Clinical Neuroscience<br>Pettersson Segerlind, Jenny; Karolinska University Hospital, Department of Neurosurgery; Karolinska Institute, Department of Clinical Neuroscience<br>Burström, Gustav ; Karolinska University Hospital, Department of Neurosurgery; Karolinska Institute, Department of Clinical Neuroscience<br>Edström, Erik; Karolinska University Hospital, Department of Neurosurgery; Karolinska Institute, Department of Clinical Neuroscience<br>Elmi-Terander, Adrian; Karolinska University Hospital, Department of Neurosurgery; Karolinska Institute, Department of Clinical Neuroscience |
| <b>Primary Subject Heading</b>: | Surgery                                                                                                                                                                                                                                                                                                                                                                                                                                                                                                                                                                                                                                                                                                                                  |
| Secondary Subject Heading:      | Surgery, Neurology, Epidemiology, Oncology                                                                                                                                                                                                                                                                                                                                                                                                                                                                                                                                                                                                                                                                                               |
| Keywords:                       | NEUROSURGERY, Neurological oncology < NEUROLOGY, Neurosurgery < SURGERY, Spine < ORTHOPAEDIC & TRAUMA SURGERY, ONCOLOGY                                                                                                                                                                                                                                                                                                                                                                                                                                                                                                                                                                                                                  |
|                                 |                                                                                                                                                                                                                                                                                                                                                                                                                                                                                                                                                                                                                                                                                                                                          |

SCHOLARONE™  
Manuscripts

# Title: Current knowledge on spinal meningiomas: a systematic review protocol

## Author information

---

### Author notes

- <sup>1,2</sup>Victor Gabriel El-Hajj ([victor.gababriel.elhajj@stud.ki.se](mailto:victor.gababriel.elhajj@stud.ki.se))  
<sup>1,2</sup>Jenny Pettersson-Segerlind, MD ([jenny.pettersson.segerlind@ki.se](mailto:jenny.pettersson.segerlind@ki.se))  
<sup>1,2</sup>Gustav Burström, MD, PhD ([gustav.burstrom@ki.se](mailto:gustav.burstrom@ki.se))  
<sup>1,2</sup>Erik Edström, MD, PhD ([erik.edstrom.1@ki.se](mailto:erik.edstrom.1@ki.se))  
<sup>1,2</sup>Adrian Elmi-Terander, Md, PhD ([adrian.elmi.terander@ki.se](mailto:adrian.elmi.terander@ki.se))

### Affiliations

- <sup>1</sup>Department of Neurosurgery, Karolinska University Hospital, Stockholm, Sweden  
<sup>2</sup>Department of Clinical Neuroscience, Karolinska Institutet, Stockholm, Sweden

### Corresponding and author

Victor Gabriel El-Hajj  
Adress: Karolinska University Hospital, Department of Neurosurgery, Eugeniavägen 6, 4th floor, Solna, Stockholm 17164.  
ORCID: <https://orcid.org/0000-0001-9479-761X>  
Email: [victor.gabriel.elhajj@stud.ki.se](mailto:victor.gabriel.elhajj@stud.ki.se)  
Number: +467659889449

**Keywords:** systematic review, spinal meningioma, current knowledge, treatment, outcomes.

**Word count:** 2700 (excluding title page, abstract, statements & references).

## 38 Abstract

---

### 39 Introduction

40 Meningiomas are primary CNS tumors that arise from both cranial and spinal meninges.  
41 Spinal meningiomas occur less frequently than their cranial counterparts and are  
42 consequently given less attention in the literature. Therefore, systematic studies are needed to  
43 summarize the current knowledge on spinal meningiomas, providing a solid evidence base  
44 for treatment strategies. This systematic review of the literature will therefore assess studies  
45 describing spinal meningiomas, their epidemiology, diagnostics, treatment, and outcomes.  
46

### 47 Methods and Analysis

48 Electronic databases including PubMed, Web of Science and Embase, will be searched using  
49 the keywords "spinal" and "meningioma". The search will be set to provide only English  
50 studies published after 2000 to avoid any conflicts regarding terminology and classification,  
51 as well as to reflect the current status. Case reports, editorials, letters, and reviews will also be  
52 excluded. Reference lists of relevant records will also be searched. Identified studies will be  
53 screened for inclusion, by one reviewer in a first step and then three in the next step to  
54 decrease the risk of bias. The results will be categorized to allow for a structured summary of  
55 the outcomes and their evidence grade conforming to the GRADE approach. Categories may  
56 include: epidemiology, histopathology, radiological diagnostics, surgery, complications, non-  
57 surgical or adjuvant treatments, disease outcomes and predictors, and lastly recurrence. This  
58 review will summarize the current knowledge on spinal meningiomas to allow for a better  
59 understanding of the disease and contribute to improve its management. For clinicians, the  
60 systematic collection and grading of available evidence may aid in decision-making and for  
61 those seeking to further the scientific field, this review may help to identify areas where  
62 knowledge is currently lacking.  
63

### 64 Ethics and dissemination

65 Ethics approval was not required for our systematic review as it is based on existing  
66 publications. The results will be disseminated via submission for publication in a peer-  
67 reviewed journal.  
68

## 69 Strengths and limitations

---

- 70 • We developed a thorough strategy to assess both risk of bias in individual studies as  
71 well as the collective quality of evidence with respect to the GRADE guidelines.
- 72 • Our broad search strategy and limited set of exclusion criteria allows for more studies  
73 to be included, ensuring adequate coverage of the topic and identification of  
74 knowledge gaps.
- 75 • By providing a comprehensive synthesis of the body of evidence, the possibility to  
76 focus future research efforts will be improved.
- 77 • We suspect that the quality of data does not suffice to perform a meta-analysis,  
78 consequently limiting the level of evidence that can be achieved.

79

80



## 81 Introduction

---

82 Meningiomas originate from the arachnoid cap cells in the leptomeninges surrounding the  
83 brain and spinal cord. Hence, they occur most frequently in an intradural extramedullary  
84 location. Meningiomas of the spinal cord are less common, making up only about 2-12% of  
85 all meningiomas<sup>1-3</sup>. In fact, much of what we know today is derived from studies on  
86 intracranial meningiomas. Spinal meningiomas are the most common primary spinal tumor in  
87 adults, representing 25-45% of all tumors and occur with an age-adjusted incidence of 0.33  
88 per 100, 000 population<sup>1</sup>. Most spinal meningiomas (90%) are benign, WHO I tumors<sup>4-6</sup>,  
89 mainly seen in the elderly with a peak incidence between the seventh and ninth decades of  
90 life<sup>2,4</sup>. Regardless of their location, meningiomas are more commonly found in females. For  
91 spinal meningiomas the female to male ratio is around 4:1<sup>2,4,7,8</sup>. Most meningiomas occur  
92 sporadically but a known genetic association to neurofibromatosis type 2 (NF2) is  
93 established, and it is estimated that up to 20% of patients with NF2 will develop spinal  
94 meningiomas, which might even appear earlier on in life<sup>9,10</sup>. Mutations of the NF2 tumor  
95 suppressor gene or loss of chromosome 22 harboring this gene was found to be more frequent  
96 among spinal meningiomas of WHO grades II and III<sup>11,12</sup>. Exposure to high-dose ionizing  
97 radiation is also associated with earlier onset of spinal meningioma<sup>1,13</sup>. Meningiomas often  
98 carry estrogen or progesterone receptors<sup>14</sup>, suggesting pregnancy as a potential risk factor for  
99 tumor growth<sup>15,16</sup>. This association was however refuted by a large population-based cohort  
100 study<sup>17</sup>. Spinal meningiomas may produce neurologic deficits and pain related to local  
101 compression of the spinal cord, nerves and adjacent structures<sup>4,18</sup>. The diagnosis is best made  
102 using MRI where meningiomas show homogenous enhancement on gadolinium enhanced T1  
103 sequences. Meningiomas also typically display dural tails, enhancement and thickening of the  
104 dura extending from the tumor<sup>19</sup>. The treatment of choice is surgery, where tumor removal  
105 typically alleviates symptoms with little risk of complications or recurrence<sup>4,7</sup>. In surgery of  
106 meningiomas, Simpson grading is used to describe the radicality of tumor removal and to  
107 predict the risk for tumor recurrence. Whether Simpson grade I, which includes complete  
108 removal of dural attachments, should be the goal of spinal meningioma surgery, remains a  
109 topic of debate<sup>4,20-23</sup>. The Simpson scale also addresses the removal or coagulation of the  
110 affected dura. Aggressive removal of the dura may reduce the risk of recurrence but increases  
111 the risk of spinal cord injury and postoperative leakage of cerebrospinal fluid. Surgical  
112 techniques with removal of the inner dural layer, may constitute an intermediate solution<sup>24,25</sup>.  
113 The most commonly reported postoperative complications are wound infections,  
114 cerebrospinal fluid leaks, kyphosis, venous thromboembolisms, and transient or permanent  
115 neurologic deficits<sup>4,7,26-28</sup>. However, these complications are rare and improvement of  
116 neurological function after tumor removal is expected in the majority of patients<sup>4,29</sup>. For  
117 patients having undergone Simpson Grade 2 resection of a spinal meningioma, Heon Kim et  
118 al have estimated a mean clinical recurrence-free survival period of 17 years<sup>21</sup>. Poor  
119 outcomes on the other hand, are reportedly associated with factors like: WHO tumor grade >  
120 1, high Ki-67 index, long time to diagnosis, large tumor size and the degree of spinal cord  
121 compression<sup>4,6,30</sup> while mortality mainly reflects high age or co-morbidities<sup>4,7</sup>. Very little data  
122 on health-related quality of life after spinal meningioma surgery is available. Two studies  
123 with mixed groups of intradural extramedullary tumors found that the vast majority of  
124 patients who underwent surgery saw a significant improvement of activity, mood, walking  
125 ability, quality of relations, sleep, and a decrease in pain<sup>31,32</sup>. These findings are consistent  
126 with the results of a quality-of-life questionnaire our group conducted on 84 spinal  
127 meningioma patients at an average of 8.7 years after surgery<sup>33</sup>. The need for alternative or  
128 adjuvant therapies is emphasized in the literature, especially for recurring tumors refractory  
129 to conventional therapies and higher-grade tumors (WHO II-III) or for patients who are poor

130 surgical candidates<sup>28,34</sup>. In these cases, other treatment modalities, including targeted,  
 131 hormonal, micro-RNA, or different forms of radiation therapy, may have to be explored.  
 132 However, the role of nonsurgical treatment options in the management of spinal  
 133 meningiomas remains poorly defined.  
 134 The systematic review proposed with this protocol aims to create a comprehensive overview  
 135 of the current understanding of spinal meningiomas, as well as to clarify the evidence base  
 136 for the treatment strategies employed today. Topics which will be reviewed include  
 137 epidemiology, tumor characteristics, diagnostics, treatment options with their potential risks  
 138 and benefits, as well as outcomes including quality of life, mortality, and recurrence. The  
 139 created overview will serve as a foundation for treatment choices and possibly to identify  
 140 areas of insufficient knowledge, warranting renewed scientific effort.  
 141 Instead of the more classic PICO criteria (Population, Intervention, Comparison, Outcome),  
 142 we decide to use the SPIDER criteria<sup>35</sup> (Sample, Phenomenon of Interest, Design, Evaluation,  
 143 Research type) which we believe are more suited to the purpose of this review (Table 1).  
 144  
 145

Table 1: SPIDER criteria<sup>35</sup>.

|                        |                                                                                              |
|------------------------|----------------------------------------------------------------------------------------------|
| Sample                 | Any patient                                                                                  |
| Phenomenon of Interest | Spinal meningiomas                                                                           |
| Design                 | Studies presenting original numeric data on the different topics of interest                 |
| Evaluation             | Epidemiology, tumor characteristics, diagnostics, treatment, patient outcome, and recurrence |
| Research Type          | Experimental and observational studies                                                       |

## 146 147 148 **Methods and analysis**

### 149 Study registration

150 This protocol for an intended systematic review is reported according to the Preferred  
 151 Reporting Items for Systematic Reviews and Meta-Analyses Protocol (PRISMA-P) statement  
 152 of 2015<sup>36</sup>. The PRISMA-P checklist is provided as supplementary material (see  
 153 *supplementary file 1*). The systematic review protocol will also be registered on PROSPERO,  
 154 before submission of the final manuscript to a peer reviewed journal.  
 155

### 156 Eligibility criteria

#### 157 **Inclusion criteria**

##### 158 Type of studies

159 All peer reviewed and original studies, written in English and available in the PubMed,  
 160 Embase, or Web of Science databases, will be eligible for inclusion. Only studies published  
 161 after 2000 will be included to limit our review to the more current publications within the  
 162 field.  
 163

##### 164 Type of participant

1  
2  
3 165 All patients will be included, regardless of age, ethnicity, and sex. Similarly, all spinal  
4 166 meningiomas irrespective of size, tumor grading or anatomical locations along the spine will  
5 167 be included. However, an adequate diagnosis of the tumor must be available and based on  
6 168 histological examination or MRI investigations.

8  
9 169

## 10 170 Type of interventions

12 171 All modes of diagnosis and treatment of spinal meningiomas will be included.

13 172

## 15 173 Type of outcome measurements

16 174 Epidemiological data such as age, sex and socioeconomic factors, possible predictors of poor  
17 175 preoperative or postoperative decline such as comorbidity and spinal cord compression will  
18 176 also be addressed. Furthermore, outcome parameters including pain, neurological function,  
19 177 quality of life, tumor recurrence and mortality, tumor characteristics including expression of  
20 178 specific receptors, markers of proliferative activity, and WHO grade will also be included.

22 179 Additional outcomes used in the selected studies may be considered. In those cases, the  
23 180 possibility of reporting biases will be recognized.

25 181

## 27 182 **Exclusion criteria**

28 183 Non-original publications such as reviews, editorials, and letters to the editor will be  
29 184 disregarded together with case reports and conference abstracts. Studies found in languages  
30 185 other than English will be excluded for practical reasons. Publications prior to the year of  
31 186 2000 will also be excluded to reduce the number of included studies and give priority to more  
32 187 current publications.

34 188

## 36 189 Databases and search strategy

37 190 An electronic database search will be performed on PubMed, Embase, and Web of Science.  
38 191 The search will be broad, excluding case reports by adding a filter to the search. Appropriate  
39 192 filters will also be used to exclude non-English studies and those published prior to the year  
40 193 2000. To illustrate the process, the preliminary search strategy for each of the databases is  
41 194 provided (see *supplementary file 2*). A reference list search of the included studies will be  
42 195 performed, to screen for any eligible article that was missed.

44 196

## 47 197 Study selection

48 198 The records retrieved from the different databases will be exported into Zotero<sup>37</sup>, to eliminate  
49 199 duplicates. The records will then be screened based on title and abstract by one reviewer, to  
50 200 eliminate records that are plainly irrelevant. This is necessary as an unmanageable number of  
51 201 records is foreseen due to the broad search strategy that will be used. In the next step, three  
52 202 independent and blinded reviewers will be assigned the task of examining the remaining  
53 203 records applying the eligibility criteria based on full-text reading. This will be performed  
54 204 using Rayyan Software<sup>38</sup>. Potential disagreements after pooling of the results will be resolved  
55 205 by discussion with a fourth reviewer. Finally, reference lists of the selected articles will be  
56 206 reviewed for any potentially eligible studies that were previously missed. The process will be  
57 207 illustrated in a PRISMA flowchart which will be provided.

208

209 Data extraction

210 Data from selected records will be extracted using a predefined extraction template,  
 211 preliminarily including (1) general information—title, first author, journal, publication year,  
 212 etc.; (2) patient characteristics and epidemiology—age, sex, tumor location, and grade, etc.;  
 213 (3) intervention characteristics—imaging, Simpson grade, adjuvant therapy, etc.; (4) study  
 214 characteristics—study type, sample size, follow-up time, etc.; and (5) outcomes—  
 215 neurological outcomes, quality of life, recurrence rate, mortality rate, follow-up time, adverse  
 216 events and their management, main conclusions, etc. The collaboration of multiple reviewers  
 217 will be sought to achieve thorough extraction of the data. The final work will even be  
 218 assessed and cross-checked to prevent any error.

220 Assessment of risk of bias

221 The Oxford Center for Evidence-Based Medicine system<sup>39</sup>, modified by Wright et al, will be  
 222 used to assess evidence levels<sup>40,41</sup> (table 2). The selected articles will first be allocated to one  
 223 of only four levels based on methodological quality, since the fifth level (V) is solely  
 224 associated to expert opinions which are systematically excluded from our study. Then, an  
 225 individual score (IS) will be proposed, as we account for the risk of bias accordingly: studies  
 226 with lower risk of bias will be upgraded while those with higher risk of bias will get  
 227 downgraded. Risk of bias will be assessed using the appropriate tools specific to the type of  
 228 study, as defined by Ma et al<sup>42</sup>. The final IS will also range from I to IV.

230 *Table 2 Level of evidence based on primary research question, by Wright et al<sup>40</sup>.*

|           | Therapeutic Studies—<br>Investigating the results of<br>treatment                                                                                                         | Prognostic Studies—<br>Investigating the outcome of<br>disease                                                                                               | Diagnostic Studies—Investigating a diagnostic<br>test                                                                                                                                           |
|-----------|---------------------------------------------------------------------------------------------------------------------------------------------------------------------------|--------------------------------------------------------------------------------------------------------------------------------------------------------------|-------------------------------------------------------------------------------------------------------------------------------------------------------------------------------------------------|
| Level I   | 1. Good-quality randomized<br>controlled trial,<br>2. Systematic review of Level-I<br>studies                                                                             | 1. Prospective study,<br>2. Systematic review of Level-<br>I studies                                                                                         | 1. Testing of previously developed diagnostic<br>criteria in series of consecutive patients (with<br>universally applied reference "gold" standard),<br>2. Systematic review of Level-I studies |
| Level II  | 1. Prospective cohort study,<br>2. Poor-quality randomized<br>controlled trial,<br>3. Systematic review,<br>a. Level-II studies,<br>b. Nonhomogeneous Level-<br>I studies | 1. Retrospective study,<br>2. Study of untreated controls<br>from a previous randomized<br>controlled trial,<br>3. Systematic review of Level-<br>II studies | 1. Development of diagnostic criteria on basis of<br>consecutive patients (with universally applied<br>reference "gold" standard),<br>2. Systematic review of Level-II studies                  |
| Level III | 1. Case-control study,<br>2. Retrospective cohort study,<br>3. Systematic review of Level-III<br>studies                                                                  |                                                                                                                                                              | 1. Study of nonconsecutive patients (no<br>consistently applied reference "gold" standard),<br>2. Systematic review of Level-III studies                                                        |
| Level IV  | Case series (with no, or historical,<br>control group)                                                                                                                    | Case series                                                                                                                                                  | 1. Case-control study,<br>2. Poor reference standard                                                                                                                                            |
| Level V   | Expert opinion                                                                                                                                                            | Expert opinion                                                                                                                                               | Expert opinion                                                                                                                                                                                  |

231

232 Quality of evidence across studies.

233 The Grading of Recommendations, Assessment, Development, and Evaluation (GRADE)<sup>43</sup>  
 234 approach will be used to rate the body of evidence behind key study outcomes assessing their  
 235 strength or certainty level. First, a baseline level will be set for each study outcome based on

the IS of the majority of studies contributing to that specific outcome, such as: if the majority of studies have an individual score of I or II the baseline grade of evidence supporting the study outcome will be classified as "high", and if the majority have individual scores of either III or IV, the baseline grade of evidence will be classified as "low". After that, we will properly adjust the baseline score after different factors like, large effect magnitude, dose-response gradient, inconsistency, indirectness, imprecision, etc.<sup>43</sup> to obtain a final quality of evidence grade of "high", "moderate", "low" or "very low"<sup>41</sup> (Table 3).

Table 3: *Quality of Evidence Grades, from the GRADE Handbook (Chapter 5)*<sup>43</sup>.

| Quality         | Definition                                                                                                                                                            |
|-----------------|-----------------------------------------------------------------------------------------------------------------------------------------------------------------------|
| <b>High</b>     | We are very confident that the true effect lies close to that of the estimate of the effect.                                                                          |
| <b>Moderate</b> | We are moderately confident in the effect estimate; the true effect is likely to be close to the estimate of the effect, but there it may be substantially different. |
| <b>Low</b>      | Our confidence in the effect estimate is limited; the true effect may be substantially different from the estimate of the effect.                                     |
| <b>Very low</b> | We have very little confidence in the effect estimate; the true effect is likely to be substantially different from the estimate of effect.                           |

We will refer to the GRADE handbook<sup>43</sup> for further assistance on this approach. A summary of findings table will be generated using the Guideline development tool (GRADEpro GDT)<sup>44</sup>. The table will convey the key study outcomes with their corresponding level of certainty (grade of evidence), in a structured and transparent manner.

### Data synthesis:

After extraction, the data obtained from eligible studies will be systematically presented. Topics of interest to this review are chosen as follows:

1. Patient characteristics: epidemiology,
2. Tumor characteristics: histopathology, WHO grading,
3. Radiological diagnostics,
4. Surgical treatment: technique, Simpson grading, intraoperative monitoring,
5. Complications and their management,
6. Non-surgical or adjuvant treatment including radiotherapy,
7. Patient outcomes: neurological outcomes, quality of life, mortality,
8. Recurrence.

Relevant data will be compiled under corresponding headings. Areas with lack of data will still be mentioned. After going through the GRADE approach, all study outcomes will be condensed in a summary of findings table, each contrasted to their respective grade of evidence. Meta-analysis will not be performed due to the anticipated high heterogeneity across the selected studies, with regards to participant and tumor characteristics as well as outcomes. In these settings, a quantitative study would therefore likely be less valuable. If an adequate number of studies is identified, subgroup analyses regarding interethnic variations and socioeconomic factors may be performed. Moreover, other subgroups reported in the eligible studies will be considered, as long as an adequate number of studies exists to support the analysis. When dealing with any such subgroups the possibility of selective reporting bias will be closely monitored<sup>45</sup>.

273

## 274 Patient and public involvement:

275 Patients were not involved in the design or conception of the study.

276

277

## 278 **Ethics and dissemination**

---

279 Ethics approval is not required for this systematic review as it is based on existing  
280 publications. We also plan to submit our work to a peer-reviewed journal where the results  
281 will be openly available.

282

## 283 **Discussion**

---

284 The intended systematic review outlined in this protocol aims to summarize the current  
285 scientific literature on spinal meningiomas to provide guidance to clinicians and identify  
286 areas in need of further study. The available literature covers many aspects of spinal  
287 meningiomas, such as incidence<sup>2,8,46</sup>, age<sup>2,4</sup>, and gender distribution<sup>2,4,7,8</sup>, treatments and their  
288 outcomes<sup>4,47,48</sup>, but many studies are limited by small sample<sup>3,48-56</sup> sizes and short follow-up  
289 times<sup>3,50,52,57</sup>. Regarding the effect of preoperative neurological impairment, tumor grade and  
290 size on postoperative outcomes<sup>3,30,50,52-59</sup> and adjuvant therapies<sup>28,34</sup> the available data is  
291 conflicting. These issues will be addressed by the systematic review's design, as integrating  
292 data from diverse origins will allow for a more representative synthesis that reflects the  
293 population of patients with spinal meningiomas more accurately<sup>60</sup>. The absence of both  
294 randomized trials and high-quality evidence within the literature as well as the dominance of  
295 observational and cohort studies is already apparent, making up the largest limitation to our  
296 review. The high heterogeneity expected among studies, with regards to populations and  
297 outcome metrics, prevents the performance of a proper meta-analysis. This constitutes the  
298 main methodological limitation to this review. Other limitations eventually encountered  
299 during the writing of the manuscript will be discussed in the corresponding part of the review.  
300 This study ought to be regarded as a reliable source for clinicians to access current evidence  
301 compiled in a systematic way and hence better understand the tumor, its epidemiology,  
302 management, and prognosis. Greater knowledge of the subject will eventually contribute to  
303 improving the diagnosis and care delivery of affected patients. Moreover, the planned  
304 systematic review could also help disclose knowledge gaps in the field, identifying and  
305 highlighting future research priorities<sup>61</sup>. To the best of our knowledge, no systematic review  
306 outlining the current understanding of spinal meningiomas has been attempted to this date,  
307 making our study the first of its kind. The protocol hereby presented is in accordance with the  
308 PRISMA-P guidelines, (see *supplementary file 1*). For further transparency, this protocol will  
309 also be registered on PROSPERO in due time. The record on PROSPERO will be updated  
310 should significant changes to the procedure take place. The final manuscript is intended for  
311 submission to peer-reviewing.

312

## 313 **Abbreviations**

---

314 IS = individual score

1  
2  
3 315 GRADE = Grading of Recommendations, Assessment, Development and Evaluation  
4 316 MRI = Magnetic Resonance Imaging  
5 317 NF2 = Neurofibromatosis type 2  
6 318 PICO = Population, Intervention, Comparison, Outcome  
7 319 PRISMA = Preferred Reporting Items for Systematic Reviews and Meta-Analyses  
8 320 SPIDER = Sample, Phenomenon of Interest, Design, Evaluation, Research type  
9 321 WHO = World health Organization  
10 322

## 323 Competing interests

---

15 324 No competing interests are reported by any of the authors.  
16 325

## 326 Contributions

---

- 21 327
- 22 328 • Victor Gabriel El-Hajj: conception & design of the work, drafting of the article, critical  
23 329 revision, and final approval of the version to be published.
  - 24 329 • Jenny Pettersson-Segerlind: conception & design of the work, drafting of the article,  
25 330 and final approval of the version to be published.
  - 26 331 • Gustav Liu Burström: conception & design of the work, drafting of the article, and  
27 332 final approval of the version to be published.
  - 28 333 • Erik Edström: conception & design of the work, drafting of the article, critical  
29 334 revision, and final approval of the version to be published.
  - 30 334 • Adrian Elmi-Terander: guarantor of the review, conception & design of the work,  
31 335 drafting of the article, critical revision, and final approval of the version to be  
32 336 published.  
33 337  
34 338

## 339 Funding

---

38 340 Not applicable.  
39 341

## 342 Ethics declarations

---

43 343 Ethics approval and consent to participate

44 344 Not applicable.

45 345 Consent for publication

46 346 Not applicable.  
47 347

## 348 Acknowledgements

---

52 349 Not applicable.  
53 350

## 351 References

---

- 57 352 1. Ogasawara, C., Philbrick, B. D., & Adamson, D. C. (2021). Meningioma: A Review of  
58 353 Epidemiology, Pathology, Diagnosis, Treatment, and Future Directions. *Biomedicines*,  
59 354 9(3), 319. <https://doi.org/10.3390/biomedicines9030319>

- 1  
2  
3 355 2. Kshetry, V. R., Hsieh, J. K., Ostrom, Q. T., Kruchko, C., Benzel, E. C., & Barnholtz-  
4 356 Sloan, J. S. (2015). Descriptive Epidemiology of Spinal Meningiomas in the United  
5 357 States. *Spine*, *40*(15), E886-9. <https://doi.org/10.1097/BRS.0000000000000974>
- 6 358 3. Maiti, T. K., Bir, S. C., Patra, D. P., Kalakoti, P., Guthikonda, B., & Nanda, A. (2016).  
7 359 Spinal meningiomas: clinicoradiological factors predicting recurrence and functional  
8 360 outcome. *Neurosurgical Focus*, *41*(2), E6. <https://doi.org/10.3171/2016.5.FOCUS16163>
- 9 361 4. Pettersson-Segerlind, J., Fletcher-Sandersjö, A., Tatter, C., Burström, G., Persson, O.,  
10 362 Förander, P., Mathiesen, T., Bartek, J., Edström, E., & Elmi-Terander, A. (2021). Long-  
11 363 Term Follow-Up and Predictors of Functional Outcome after Surgery for Spinal  
12 364 Meningiomas: A Population-Based Cohort Study. *Cancers* *2021*, *Vol. 13*, Page 3244,  
13 365 *13*(13), 3244. <https://doi.org/10.3390/CANCERS13133244>
- 14 366 5. Westwick, H. J., & Shamji, M. F. (2015). Effects of sex on the incidence and prognosis of  
15 367 spinal meningiomas: a Surveillance, Epidemiology, and End Results study. *Journal of*  
16 368 *Neurosurgery: Spine*, *23*(3), 368–373. <https://doi.org/10.3171/2014.12.SPINE14974>
- 17 369 6. Hua, L., Zhu, H., Deng, J., Tian, M., Jiang, X., Tang, H., Luan, S., Wakimoto, H., Xie, Q.,  
18 370 & Gong, Y. (2018). Clinical and prognostic features of spinal meningioma: a thorough  
19 371 analysis from a single neurosurgical center. *Journal of Neuro-Oncology*, *140*(3), 639–  
20 372 647. <https://doi.org/10.1007/S11060-018-2993-3/TABLES/4>
- 21 373 7. Kwee, L. E., Harhangi, B. S., Ponne, G. A., Kros, J. M., Dirven, C. M. F., & Dammers, R.  
22 374 (2020). Spinal meningiomas: Treatment outcome and long-term follow-up. *Clinical*  
23 375 *Neurology and Neurosurgery*, *198*, 106238.  
24 376 <https://doi.org/10.1016/J.CLINEURO.2020.106238>
- 25 377 8. Duong, L. M., McCarthy, B. J., McLendon, R. E., Dolecek, T. A., Kruchko, C., Douglas,  
26 378 L. L., & Ajani, U. A. (2012). Descriptive epidemiology of malignant and nonmalignant  
27 379 primary spinal cord, spinal meninges, and cauda equina tumors, United States, 2004-  
28 380 2007. *Cancer*, *118*(17), 4220–4227. <https://doi.org/10.1002/CNCR.27390>
- 29 381 9. Evans, D. G. R., Sainio, M., & Baser, M. E. (2000). Neurofibromatosis type 2. *Journal of*  
30 382 *Medical Genetics*, *37*(12), 897. <https://doi.org/10.1136/JMG.37.12.897>
- 31 383 10. Karsy, M., Guan, J., Sivakumar, W., Neil, J. A., Schmidt, M. H., & Mahan, M. A. (2015).  
32 384 The genetic basis of intradural spinal tumors and its impact on clinical treatment.  
33 385 *Neurosurgical Focus*, *39*(2), E3. <https://doi.org/10.3171/2015.5.FOCUS15143>
- 34 386 11. Arslantas, A., Artan, S., Öner, Ü., Durmaz, R., Müslümanoğlu, H., Atasoy, M. A.,  
35 387 Başaran, N., & Tel, E. (2003). Detection of Chromosomal Imbalances in Spinal  
36 388 Meningiomas by Comparative Genomic Hybridization. *Neurologia Medico-Chirurgica*,  
37 389 *43*(1), 12–19. <https://doi.org/10.2176/NMC.43.12>
- 38 390 12. Pawloski, J. A., Fadel, H. A., Huang, Y.-W., Lee, I. Y., Pawloski, C. :, Fadel, J. A. :,  
39 391 Huang, H. A. :, Lee, Y.-W. :, Genomic, I. Y., & Baldi, A. (2021). Genomic Biomarkers  
40 392 of Meningioma: A Focused Review. *International Journal of Molecular Sciences* *2021*,  
41 393 *Vol. 22*, Page 10222, *22*(19), 10222. <https://doi.org/10.3390/IJMS221910222>
- 42 394 13. Cohen-Gadol, A. A., Zikel, O. M., Koch, C. A., Scheithauer, B. W., & Krauss, W. E.  
43 395 (2003). Spinal meningiomas in patients younger than 50 years of age: a 21-year  
44 396 experience. *Journal of Neurosurgery: Spine*, *98*(3), 258–263.  
45 397 <https://doi.org/10.3171/SPI.2003.98.3.0258>
- 46 398 14. Maiuri, F., Mariniello, G., de Divitiis, O., Esposito, F., Guadagno, E., Teodonno, G.,  
47 399 Barbato, M., & del Basso De Caro, M. (2021). Progesterone Receptor Expression in  
48 400 Meningiomas: Pathological and Prognostic Implications. *Frontiers in Oncology*, *11*,  
49 401 2585. <https://doi.org/10.3389/FONC.2021.611218/BIBTEX>
- 50 402 15. Antolínez Ayala, V. E., García Arias, M. D., Bautista Vargas, S. E., Báez Cárdenas, L.  
51 403 M., & Castellanos Peñaranda, C. (2021). Paraplegia due to spinal meningioma during



- the third trimester of pregnancy: case report and literature review. *Spinal Cord Series and Cases* 2021 7:1, 7(1), 1–5. <https://doi.org/10.1038/s41394-020-00368-0>
16. Hortobágyi, T., Bencze, J., Murnyák, B., Kouhsari, M. C., Bognár, L., & Marko-Varga, G. (2017). Pathophysiology of meningioma growth in pregnancy. *Open Medicine (Poland)*, 12(1), 195–200. <https://doi.org/10.1515/MED-2017-0029/MACHINEREADABLECITATION/RIS>
17. Pettersson-Segerlind, J., Mathiesen, T., Elmi-Terander, A., Edström, E., Talbäck, M., Feychting, M., & Tettamanti, G. (2021). The risk of developing a meningioma during and after pregnancy. *Scientific Reports* 2021 11:1, 11(1), 1–8. <https://doi.org/10.1038/s41598-021-88742-2>
18. Abul-Kasim, K., Thurnher, M. M., McKeever, P., & Sundgren, P. C. (2008). Intradural spinal tumors: current classification and MRI features. *Neuroradiology*, 50(4), 301–314. <https://doi.org/10.1007/S00234-007-0345-7>
19. Watts, J., Box, G., Galvin, A., Brochie, P., Trost, N., & Sutherland, T. (2014). Magnetic resonance imaging of meningiomas: A pictorial review. *Insights into Imaging*, 5(1), 113–122. <https://doi.org/10.1007/S13244-013-0302-4/FIGURES/21>
20. Tsuda, K., Akutsu, H., Yamamoto, T., Nakai, K., Ishikawa, E., & Matsumura, A. (2014). Is Simpson Grade I Removal Necessary in All Cases of Spinal Meningioma? Assessment of Postoperative Recurrence during Long-Term Follow-up. *Neurologia Medico-Chirurgica*, 54(11), 907–913. <https://doi.org/10.2176/NMC.OA.2013-0311>
21. Kim, C. H., Chung, C. K., Lee, S. H., Jahng, T. A., Hyun, S. J., Kim, K. J., Yoon, S. H., Kim, E. S., Eoh, W., Kim, H. J., Kim, K. T., Sung, J. K., & Choi, Y. (2016). Long-term recurrence rates after the removal of spinal meningiomas in relation to Simpson grades. *European Spine Journal*, 25(12), 4025–4032. <https://doi.org/10.1007/S00586-015-4306-2/FIGURES/2>
22. Voldřich, R., Netuka, D., & Beneš, V. (2020). Spinal meningiomas: is Simpson grade II resection radical enough? *Acta Neurochirurgica*, 162(6), 1401–1408. <https://doi.org/10.1007/S00701-020-04280-2/FIGURES/2>
23. Nakamura, M., Tsuji, O., Fujiyoshi, K., Hosogane, N., Watanabe, K., Tsuji, T., Ishii, K., Toyama, Y., Chiba, K., & Matsumoto, M. (2012). Long-term surgical outcomes of spinal meningiomas. *Spine*, 37(10). <https://doi.org/10.1097/BRS.0B013E31824167F1>
24. Tominaga, H., Kawamura, I., Ijiri, K., Yone, K., & Taniguchi, N. (2021). Surgical results of the resection of spinal meningioma with the inner layer of dura more than 10 years after surgery. *Scientific Reports*, 11(1). <https://doi.org/10.1038/S41598-021-83712-0>
25. Saito, T., Arizono, T., Maeda, T., Terada, K., & Iwamoto, Y. (2001). A novel technique for surgical resection of spinal meningioma. *Spine*, 26(16), 1805–1808. <https://doi.org/10.1097/00007632-200108150-00017>
26. Tatter, C., Fletcher-Sandersjö, A., Persson, O., Burström, G., Grane, P., Edström, E., & Elmi-Terander, A. (2020). Incidence and predictors of kyphotic deformity following resection of cervical intradural tumors in adults: a population-based cohort study. *Acta Neurochirurgica*, 162(11), 2905–2913. <https://doi.org/10.1007/S00701-020-04416-4/FIGURES/5>
27. Yoon, S. H., Chung, C. K., & Jahng, T. A. (2007). Surgical Outcome of Spinal Canal Meningiomas. *Journal of Korean Neurosurgical Society*, 42(4), 300–304. <https://doi.org/10.3340/JKNS.2007.42.4.300>
28. Westwick, H. J., Yuh, S. J., & Shamji, M. F. (2015). Complication Avoidance in the Resection of Spinal Meningiomas. *World Neurosurgery*, 83(4), 627–634. <https://doi.org/10.1016/J.WNEU.2014.12.015>
29. Bydon, M., & Gokaslan, Z. L. (2015). Spinal Meningioma Resection. *World Neurosurgery*, 83(6), 1032–1033. <https://doi.org/10.1016/J.WNEU.2015.01.049>

- 1  
2  
3 454 30. Frati, A., Pesce, A., Toccaceli, G., Frascchetti, F., Caruso, R., & Raco, A. (2019). Spinal  
4 455 Meningiomas Prognostic Evaluation Score (SPES): predicting the neurological  
5 456 outcomes in spinal meningioma surgery. *Neurosurgical Review*, 42(1), 115–125.  
6 457 <https://doi.org/10.1007/S10143-018-0961-1/FIGURES/4>
- 7  
8 458 31. Newman, W. C., Berry-Candelario, J., Villavieja, J., Reiner, A. S., Bilsky, M. H., Laufer,  
9 459 I., & Barzilai, O. (2021). Improvement in Quality of Life Following Surgical Resection  
10 460 of Benign Intradural Extramedullary Tumors: A Prospective Evaluation of Patient-  
11 461 Reported Outcomes. *Neurosurgery*, 88(5), 989–995.  
12 462 <https://doi.org/10.1093/NEUROS/NYAA561>
- 13 463 32. Viereck, M. J., Ghobrial, G. M., Beygi, S., & Harrop, J. S. (2016). Improved patient  
14 464 quality of life following intradural extramedullary spinal tumor resection. *Journal of*  
15 465 *Neurosurgery: Spine*, 25(5), 640–645. <https://doi.org/10.3171/2016.4.SPINE151149>
- 16 466 33. Pettersson-Segerlind, J., Vogelsang, A.-C. von, Fletcher-Sandersjö, A., Tatter, C.,  
17 467 Mathiesen, T., Edström, E., & Elmi-Terander, A. (2021). Health-Related Quality of Life  
18 468 and Return to Work after Surgery for Spinal Meningioma: A Population-Based Cohort  
19 469 Study. *Cancers 2021, Vol. 13, Page 6371*, 13(24), 6371.  
20 470 <https://doi.org/10.3390/CANCERS13246371>
- 21 471 34. Yolcu, Y. U., Goyal, A., Alvi, M. A., Moinuddin, F. M., & Bydon, M. (2019). Trends in  
22 472 the utilization of radiotherapy for spinal meningiomas: insights from the 2004–2015  
23 473 National Cancer Database. *Neurosurgical Focus*, 46(6), E6.  
24 474 <https://doi.org/10.3171/2019.3.FOCUS1969>
- 25 475 35. Cooke, A., Smith, D., & Booth, A. (2012). Beyond PICO: The SPIDER tool for  
26 476 qualitative evidence synthesis. *Qualitative Health Research*, 22(10), 1435–1443.  
27 477 <https://doi.org/10.1177/1049732312452938>
- 28 478 36. Moher, D., Shamseer, L., Clarke, M., Ghersi, D., Liberati, A., Petticrew, M., Shekelle, P.,  
29 479 Stewart, L. A., Estarli, M., Barrera, E. S. A., Martínez-Rodríguez, R., Baladia, E.,  
30 480 Agüero, S. D., Camacho, S., Buhring, K., Herrero-López, A., Gil-González, D. M.,  
31 481 Altman, D. G., Booth, A., ... Whitlock, E. (2016). Preferred reporting items for  
32 482 systematic review and meta-analysis protocols (PRISMA-P) 2015 statement. *Revista*  
33 483 *Espanola de Nutricion Humana y Dietetica*, 20(2), 148–160.  
34 484 <https://doi.org/10.1186/2046-4053-4-1/TABLES/4>
- 35 485 37. Roy Rosenzweig Center for History and New Media. (2016) Zotero [Computer software].  
36 486 Retrieved from [www.zotero.org/download](http://www.zotero.org/download). (n.d.).
- 37 487 38. Ouzzani, M., Hammady, H., Fedorowicz, Z., & Elmagarmid, A. (2016). Rayyan—a web  
38 488 and mobile app for systematic reviews. *Systematic Reviews*, 5(1), 210.  
39 489 <https://doi.org/10.1186/s13643-016-0384-4>
- 40 490 39. OCEBM Levels of Evidence Working Group\*. “The Oxford 2011 Levels of Evidence”.  
41 491 Oxford Centre for Evidence-Based Medicine.  
42 492 <http://www.cebm.net/index.aspx?o=5653> \* OCEBM Table of Evidence Working Group  
43 493 = Jeremy Howick, Iain Chalmers (James Lind Library), Paul Glasziou, Trish  
44 494 Greenhalgh, Carl Heneghan, Alessandro Liberati, Ivan Moschetti, Bob Phillips, Hazel  
45 495 Thornton, Olive Goddard and Mary Hodgkinson. (n.d.).
- 46 496 40. Wright, J. G., Swiontkowski, M. F., & Heckman, J. D. (2003). Introducing levels of  
47 497 evidence to the journal. *The Journal of Bone and Joint Surgery. American Volume*,  
48 498 85(1), 1–3.
- 49 499 41. Anderson, K. K., Tetreault, L., Shamji, M. F., Singh, A., Vukas, R. R., Harrop, J. S.,  
50 500 Fehlings, M. G., Vaccaro, A. R., Hilibrand, A. S., & Arnold, P. M. (2015). Optimal  
51 501 Timing of Surgical Decompression for Acute Traumatic Central Cord Syndrome.  
52 502 *Neurosurgery*, 77, S15–S32. <https://doi.org/10.1227/NEU.0000000000000946>

- 1  
2  
3 503 42. Ma, L. L., Wang, Y. Y., Yang, Z. H., Huang, D., Weng, H., & Zeng, X. T. (2020).  
4 504 Methodological quality (risk of bias) assessment tools for primary and secondary  
5 505 medical studies: What are they and which is better? *Military Medical Research*, 7(1), 1–  
6 506 11. <https://doi.org/10.1186/S40779-020-00238-8/TABLES/1>
- 7 507 43. Schünemann H, Brożek J, Guyatt G, Oxman A, editors. *GRADE handbook for grading*  
8 508 *quality of evidence and strength of recommendations. Updated October 2013. The*  
9 509 *GRADE Working Group, 2013. Available from [guidelinedevelopment.org/handbook](http://guidelinedevelopment.org/handbook).*  
10 510 (n.d.).
- 11 511 44. *GRADEpro GDT: GRADEpro Guideline Development Tool [Software]. McMaster*  
12 512 *University, 2020 (developed by Evidence Prime, Inc.). Available from [grade.pro](http://grade.pro).*  
13 513 (n.d.).
- 14 514 45. Reid, E. K., Tejani, A. M., Huan, L. N., Egan, G., O’Sullivan, C., Mayhew, A. D., &  
15 515 Kabir, M. (2015). Managing the incidence of selective reporting bias: A survey of  
16 516 Cochrane review groups. *Systematic Reviews*, 4(1), 1–8. [https://doi.org/10.1186/S13643-](https://doi.org/10.1186/S13643-015-0070-Y/FIGURES/3)  
17 517 015-0070-Y/FIGURES/3
- 18 518 46. Weber, C., Gulati, S., Jakola, A. S., Habiba, S., Nygaard, Ø. P., Johannesen, T. B., &  
19 519 Solheim, O. (2014). Incidence rates and surgery of primary intraspinal tumors in the era  
20 520 of modern neuroimaging: a national population-based study. *Spine*, 39(16).  
21 521 <https://doi.org/10.1097/BRS.0000000000000412>
- 22 522 47. Sandalcioglu, I. E., Hunold, A., Müller, O., Bassiouni, H., Stolke, D., & Asgari, S.  
23 523 (2008). Spinal meningiomas: Critical review of 131 surgically treated patients.  
24 524 *European Spine Journal*, 17(8), 1035–1041. [https://doi.org/10.1007/S00586-008-0685-](https://doi.org/10.1007/S00586-008-0685-Y/TABLES/4)  
25 525 Y/TABLES/4
- 26 526 48. Hohenberger, C., Gugg, C., Schmidt, N. O., Zeman, F., & Schebesch, K. M. (2020).  
27 527 Functional outcome after surgical treatment of spinal meningioma. *Journal of Clinical*  
28 528 *Neuroscience*, 77, 62–66. <https://doi.org/10.1016/J.JOCN.2020.05.042>
- 29 529 49. Morandi, X., Haegelen, C., Riffaud, L., Amlashi, S., Adn, M., & Brassier, G. (2004).  
30 530 Results in the operative treatment of elderly patients with spinal meningiomas. *Spine*,  
31 531 29(19), 2191–2194. <https://doi.org/10.1097/01.BRS.0000141173.79572.40>
- 32 532 50. Arima, H., Takami, T., Yamagata, T., Naito, K., Abe, J., Shimokawa, N., & Ohata, K.  
33 533 (2014). Surgical management of spinal meningiomas: A retrospective case analysis  
34 534 based on preoperative surgical grade. *Surgical Neurology International*, 5(Suppl 7),  
35 535 S333. <https://doi.org/10.4103/2152-7806.139642>
- 36 536 51. Sacko, O., Haegelen, C., Mendes, V., Brenner, A., Sesay, M., Brauge, D., Lagarrigue, J.,  
37 537 Loiseau, H., & Roux, F. E. (2009). SPINAL MENINGIOMA SURGERY IN  
38 538 ELDERLY PATIENTS WITH PARAPLEGIA OR SEVERE PARAPARESIS A  
39 539 MULTICENTER STUDY. *Neurosurgery*, 64(3), 503–510.  
40 540 <https://doi.org/10.1227/01.NEU.0000338427.44471.1D>
- 41 541 52. Haegelen, C., Morandi, X., Riffaud, L., Amlashi, S. F. A., Leray, E., & Brassier, G.  
42 542 (2005). Results of spinal meningioma surgery in patients with severe preoperative  
43 543 neurological deficits. *European Spine Journal*, 14(5), 440–444.  
44 544 <https://doi.org/10.1007/S00586-004-0809-Y/TABLES/3>
- 45 545 53. Schaller, B. (2005). Spinal Meningioma: Relationship Between Histological Subtypes and  
46 546 Surgical Outcome? *Journal of Neuro-Oncology* 2005 75:2, 75(2), 157–161.  
47 547 <https://doi.org/10.1007/S11060-005-1469-4>
- 48 548 54. Setzer, M., Vatter, H., Marquardt, G., Seifert, V., & Vrionis, F. D. (2007). Management  
49 549 of spinal meningiomas: surgical results and a review of the literature. *Neurosurgical*  
50 550 *Focus*, 23(4), E14. <https://doi.org/10.3171/FOC-07/10/E14>
- 51 551 55. Gilard, V., Goia, A., Ferracci, F. X., Marguet, F., Magne, N., Langlois, O., Perez, A., &  
52 552 Derrey, S. (2018). Spinal meningioma and factors predictive of post-operative

- deterioration. *Journal of Neuro-Oncology*, 140(1), 49–54.  
<https://doi.org/10.1007/S11060-018-2929-Y/TABLES/4>
56. Gezen, F., Kahraman, S., Çanakci, Z., & Bedük, A. (2000). Review of 36 Cases of Spinal Cord Meningioma. *Spine*, 25(6), 727–731. <https://doi.org/10.1097/00007632-200003150-00013>
57. Bayoumi, A. B., Laviv, Y., Karaali, C. N., Ertlav, K., Kepoglu, U., Toktas, Z. O., Konya, D., & Kasper, E. M. (2020). Spinal meningiomas: 61 cases with predictors of early postoperative surgical outcomes. *Journal of Neurosurgical Sciences*, 64(5), 446–451. <https://doi.org/10.23736/S0390-5616.17.04102-9>
58. Raco, A., Pesce, A., Toccaceli, G., Domenicucci, M., Miscusi, M., & Delfini, R. (2017). Factors leading to a poor functional outcome in spinal meningioma surgery: Remarks on 173 cases. *Neurosurgery*, 80(4), 602–609. <https://doi.org/10.1093/NEUROS/NYW092>
59. Klekamp, J., & Samii, M. (1999). Surgical results for spinal meningiomas. *Surgical Neurology*, 52(6), 552–562. [https://doi.org/10.1016/S0090-3019\(99\)00153-6](https://doi.org/10.1016/S0090-3019(99)00153-6)
60. Edwards, T. B. (2014). What is the value of a systematic review? *Journal of Shoulder and Elbow Surgery*, 23(1), 1–2. <https://doi.org/10.1016/J.JSE.2013.09.001>
61. Lasserson TJ, Thomas J, Higgins JPT. Chapter 1: Starting a review. In: Higgins JPT, Thomas J, Chandler J, Cumpston M, Li T, Page MJ, Welch VA (editors). *Cochrane Handbook for Systematic Reviews of Interventions version 6.2 (updated February 2021)*. Cochrane, 2021. Available from [www.training.cochrane.org/handbook](http://www.training.cochrane.org/handbook). (n.d.).

## Supplementary information

- 575 [Supplementary file 1: PRISMA-P 2015 Checklist.](#)  
576 [Supplementary file 2: Search strategy.](#)

# Reporting checklist for protocol of a systematic review and meta analysis.

Based on the PRISMA-P guidelines.

Reference: Moher D, Shamseer L, Clarke M, Ghersi D, Liberati A, Petticrew M, Shekelle P, Stewart LA. Preferred Reporting Items for Systematic Review and Meta-Analysis Protocols (PRISMA-P) 2015 statement. Syst Rev. 2015;4(1):1.

|                     | Reporting Item                                                                                                                                                | Section                                                     |
|---------------------|---------------------------------------------------------------------------------------------------------------------------------------------------------------|-------------------------------------------------------------|
| <b>Title</b>        |                                                                                                                                                               |                                                             |
| Identification      | <a href="#">#1a</a> Identify the report as a protocol of a systematic review                                                                                  | Title                                                       |
| Update              | <a href="#">#1b</a> If the protocol is for an update of a previous systematic review, identify as such                                                        | n/a                                                         |
| <b>Registration</b> |                                                                                                                                                               |                                                             |
|                     | <a href="#">#2</a> If registered, provide the name of the registry (such as PROSPERO) and registration number                                                 | n/a (this protocol is planned for registration on PROSPERO) |
| <b>Authors</b>      |                                                                                                                                                               |                                                             |
| Contact             | <a href="#">#3a</a> Provide name, institutional affiliation, e-mail address of all protocol authors; provide physical mailing address of corresponding author | Author information                                          |
| Contribution        | <a href="#">#3b</a> Describe contributions of protocol authors and identify the guarantor of the review                                                       | Contributions                                               |
| <b>Amendments</b>   |                                                                                                                                                               |                                                             |
|                     | <a href="#">#4</a> If the protocol represents an amendment of a previously completed or published protocol,                                                   | n/a                                                         |

1 identify as such and list changes; otherwise,  
 2 state plan for documenting important protocol  
 3 amendments  
 4

## 5 Support

6 Sources [#5a](#) Indicate sources of financial or other support n/a  
 7 for the review

8 Sponsor [#5b](#) Provide name for the review funder and / or n/a  
 9 sponsor

10 Role of sponsor [#5c](#) Describe roles of funder(s), sponsor(s), and / n/a  
 11 or funder or institution(s), if any, in developing the  
 12 protocol

## 13 Introduction

14 Rationale [#6](#) Describe the rationale for the review in the Abstract and last part of  
 15 context of what is already known Introduction

16 Objectives [#7](#) Provide an explicit statement of the question(s) Last part of introduction  
 17 the review will address with reference to  
 18 participants, interventions, comparators, and  
 19 outcomes (PICO)

## 20 Methods

21 Eligibility criteria [#8](#) Specify the study characteristics (such as Methods and analysis:  
 22 PICO, study design, setting, time frame) and Eligibility criteria section  
 23 report characteristics (such as years  
 24 considered, language, publication status) to be  
 25 used as criteria for eligibility for the review

26 Information [#9](#) Describe all intended information sources Methods and analysis:  
 27 sources (such as electronic databases, contact with Databases and search  
 28 study authors, trial registers or other grey strategy section  
 29 literature sources) with planned dates of  
 30 coverage

31 Search strategy [#10](#) Present draft of search strategy to be used for Methods and analysis:  
 32 at least one electronic database, including Databases and search  
 33 planned limits, such that it could be repeated strategy section and

supplementary file 2

|    |                    |                      |                                                   |
|----|--------------------|----------------------|---------------------------------------------------|
| 1  |                    |                      |                                                   |
| 2  |                    |                      |                                                   |
| 3  | Study records -    | <a href="#">#11a</a> | Describe the mechanism(s) that will be used to    |
| 4  | data               |                      | manage records and data throughout the            |
| 5  | management         |                      | review                                            |
| 6  |                    |                      |                                                   |
| 7  |                    |                      |                                                   |
| 8  | Study records -    | <a href="#">#11b</a> | State the process that will be used for           |
| 9  | selection process  |                      | selecting studies (such as two independent        |
| 10 |                    |                      | reviewers) through each phase of the review       |
| 11 |                    |                      | (that is, screening, eligibility and inclusion in |
| 12 |                    |                      | meta-analysis)                                    |
| 13 |                    |                      |                                                   |
| 14 |                    |                      |                                                   |
| 15 |                    |                      |                                                   |
| 16 |                    |                      |                                                   |
| 17 | Study records -    | <a href="#">#11c</a> | Describe planned method of extracting data        |
| 18 | data collection    |                      | from reports (such as piloting forms, done        |
| 19 | process            |                      | independently, in duplicate), any processes for   |
| 20 |                    |                      | obtaining and confirming data from                |
| 21 |                    |                      | investigators                                     |
| 22 |                    |                      |                                                   |
| 23 |                    |                      |                                                   |
| 24 |                    |                      |                                                   |
| 25 | Data items         | <a href="#">#12</a>  | List and define all variables for which data will |
| 26 |                    |                      | be sought (such as PICO items, funding            |
| 27 |                    |                      | sources), any pre-planned data assumptions        |
| 28 |                    |                      | and simplifications                               |
| 29 |                    |                      |                                                   |
| 30 |                    |                      |                                                   |
| 31 |                    |                      |                                                   |
| 32 | Outcomes and       | <a href="#">#13</a>  | List and define all outcomes for which data will  |
| 33 | prioritization     |                      | be sought, including prioritization of main and   |
| 34 |                    |                      | additional outcomes, with rationale               |
| 35 |                    |                      |                                                   |
| 36 |                    |                      |                                                   |
| 37 |                    |                      |                                                   |
| 38 | Risk of bias in    | <a href="#">#14</a>  | Describe anticipated methods for assessing        |
| 39 | individual studies |                      | risk of bias of individual studies, including     |
| 40 |                    |                      | whether this will be done at the outcome or       |
| 41 |                    |                      | study level, or both; state how this information  |
| 42 |                    |                      | will be used in data synthesis                    |
| 43 |                    |                      |                                                   |
| 44 |                    |                      |                                                   |
| 45 |                    |                      |                                                   |
| 46 | Data synthesis     | <a href="#">#15a</a> | Describe criteria under which study data will     |
| 47 |                    |                      | be quantitatively synthesised                     |
| 48 |                    |                      |                                                   |
| 49 |                    |                      |                                                   |
| 50 |                    |                      |                                                   |
| 51 |                    |                      |                                                   |
| 52 |                    |                      |                                                   |
| 53 | Data synthesis     | <a href="#">#15b</a> | If data are appropriate for quantitative          |
| 54 |                    |                      | synthesis, describe planned summary               |
| 55 |                    |                      | measures, methods of handling data and            |
| 56 |                    |                      | methods of combining data from studies,           |
| 57 |                    |                      |                                                   |
| 58 |                    |                      |                                                   |
| 59 |                    |                      |                                                   |
| 60 |                    |                      |                                                   |

including any planned exploration of consistency (such as I<sup>2</sup>, Kendall's  $\tau$ )

|    |                |                      |                                                                                                                               |
|----|----------------|----------------------|-------------------------------------------------------------------------------------------------------------------------------|
| 1  |                |                      |                                                                                                                               |
| 2  |                |                      |                                                                                                                               |
| 3  |                |                      |                                                                                                                               |
| 4  | Data synthesis | <a href="#">#15c</a> | Describe any proposed additional analyses (such as sensitivity or subgroup analyses, meta-regression)                         |
| 5  |                |                      | n/a                                                                                                                           |
| 6  |                |                      |                                                                                                                               |
| 7  |                |                      |                                                                                                                               |
| 8  |                |                      |                                                                                                                               |
| 9  |                |                      |                                                                                                                               |
| 10 | Data synthesis | <a href="#">#15d</a> | If quantitative synthesis is not appropriate, describe the type of summary planned                                            |
| 11 |                |                      | Methods and analysis:<br>Data synthesis section                                                                               |
| 12 |                |                      |                                                                                                                               |
| 13 |                |                      |                                                                                                                               |
| 14 | Meta-bias(es)  | <a href="#">#16</a>  | Specify any planned assessment of meta-bias(es) (such as publication bias across studies, selective reporting within studies) |
| 15 |                |                      | Methods and analysis:<br>Risk of bias section                                                                                 |
| 16 |                |                      |                                                                                                                               |
| 17 |                |                      |                                                                                                                               |
| 18 |                |                      |                                                                                                                               |
| 19 | Confidence in  | <a href="#">#17</a>  | Describe how the strength of the body of                                                                                      |
| 20 | cumulative     |                      | evidence will be assessed (such as GRADE)                                                                                     |
| 21 | evidence       |                      | Methods and analysis:<br>Risk of bias and Quality<br>of evidence sections                                                     |
| 22 |                |                      |                                                                                                                               |
| 23 |                |                      |                                                                                                                               |
| 24 |                |                      |                                                                                                                               |
| 25 |                |                      |                                                                                                                               |
| 26 |                |                      |                                                                                                                               |

27 The PRISMA-P elaboration and explanation paper is distributed under the terms of the Creative  
 28 Commons Attribution License CC-BY. This checklist was completed on 29. January 2022 using  
 29 <https://www.goodreports.org/>, a tool made by the [EQUATOR Network](#) in collaboration with  
 30 [Penelope.ai](#)  
 31  
 32  
 33  
 34  
 35  
 36  
 37  
 38  
 39  
 40  
 41  
 42  
 43  
 44  
 45  
 46  
 47  
 48  
 49  
 50  
 51  
 52  
 53  
 54  
 55  
 56  
 57  
 58  
 59  
 60



| Database       | Queries                                                                                                                                                                                                                                                                                                                                                                                                                                                                                                                                                                                                                         |
|----------------|---------------------------------------------------------------------------------------------------------------------------------------------------------------------------------------------------------------------------------------------------------------------------------------------------------------------------------------------------------------------------------------------------------------------------------------------------------------------------------------------------------------------------------------------------------------------------------------------------------------------------------|
| PubMed         | (((("spinal meningioma*" [Title] NOT "case report" [All Fields]) AND 2000/01/01:3000/12/31 [Date - Publication] AND "english" [Language] AND ("loattrfull text" [Filter] AND "humans" [MeSH Terms] AND "english" [Language])) OR (((("spin*" [All Fields] AND ("meningioma" [MeSH Terms] OR "meningioma" [All Fields] OR "meningiomas" [All Fields])) NOT ("case reports" [Publication Type] OR "case report" [All Fields])) AND 2000/01/01:3000/12/31 [Date - Publication] AND ("loattrfull text" [Filter] AND "humans" [MeSH Terms] AND "english" [Language]))) AND ((ft[Filter]) AND (humans[Filter]) AND (english[Filter])) |
| Web of Science | ((ALL=("spinal meningioma") AND PY=(2000-2500) AND LA=(English) NOT TS=("CASE REPORT")) NOT (TASCA=("VETERINARY SCIENCES") OR DT=("EDITORIAL MATERIAL" OR "LETTER" OR "MEETING ABSTRACT"))) OR ((TI=(spinal AND meningioma*) AND PY=(2000-2500) AND LA=(English) NOT TI=(case report)) NOT (TASCA=("VETERINARY SCIENCES") OR DT=("EDITORIAL MATERIAL" OR "LETTER" OR "MEETING ABSTRACT")))                                                                                                                                                                                                                                      |
| Embase         | spinal meningioma*':ab,ti NOT 'case report' AND [2000-2021]/py NOT ('spinal meningioma*':ab,ti NOT 'case report' AND [2000-2021]/py) AND ('animal experiment'/de OR 'animal model'/de OR 'animal tissue'/de OR 'nonhuman'/de)                                                                                                                                                                                                                                                                                                                                                                                                   |
