# Supplementary material for: Current knowledge on spinal meningiomas: a systematic review protocol
Source: PubMed Central journal article supplement — BMJ Open. 2022 Jun 22;12(6):e061614. doi: 10.1136/bmjopen-2022-061614 (PMC9226977; doi:10.1136/bmjopen-2022-061614), 2022-06-22
Supplement: bmjopen-2022-061614supp001.pdf [file bmjopen-2022-061614supp001.pdf]

# Reporting checklist for protocol of a systematic review and meta analysis.

Based on the PRISMA-P guidelines.

Reference: Moher D, Shamseer L, Clarke M, Ghersi D, Liberati A, Petticrew M, Shekelle P, Stewart LA. Preferred Reporting Items for Systematic Review and Meta-Analysis Protocols (PRISMA-P) 2015 statement. *Syst Rev.* 2015;4(1):1.

|                     | Reporting Item                                                                                                                                                | Section                                                     |
|---------------------|---------------------------------------------------------------------------------------------------------------------------------------------------------------|-------------------------------------------------------------|
| <b>Title</b>        |                                                                                                                                                               |                                                             |
| Identification      | <a href="#">#1a</a> Identify the report as a protocol of a systematic review                                                                                  | Title                                                       |
| Update              | <a href="#">#1b</a> If the protocol is for an update of a previous systematic review, identify as such                                                        | n/a                                                         |
| <b>Registration</b> |                                                                                                                                                               |                                                             |
|                     | <a href="#">#2</a> If registered, provide the name of the registry (such as PROSPERO) and registration number                                                 | n/a (this protocol is planned for registration on PROSPERO) |
| <b>Authors</b>      |                                                                                                                                                               |                                                             |
| Contact             | <a href="#">#3a</a> Provide name, institutional affiliation, e-mail address of all protocol authors; provide physical mailing address of corresponding author | Author information                                          |
| Contribution        | <a href="#">#3b</a> Describe contributions of protocol authors and identify the guarantor of the review                                                       | Contributions                                               |
| <b>Amendments</b>   |                                                                                                                                                               |                                                             |
|                     | <a href="#">#4</a> If the protocol represents an amendment of a previously completed or published protocol,                                                   | n/a                                                         |

identify as such and list changes; otherwise, state plan for documenting important protocol amendments

## Support

|                           |                     |                                                                                                      |     |
|---------------------------|---------------------|------------------------------------------------------------------------------------------------------|-----|
| Sources                   | <a href="#">#5a</a> | Indicate sources of financial or other support for the review                                        | n/a |
| Sponsor                   | <a href="#">#5b</a> | Provide name for the review funder and / or sponsor                                                  | n/a |
| Role of sponsor or funder | <a href="#">#5c</a> | Describe roles of funder(s), sponsor(s), and / or institution(s), if any, in developing the protocol | n/a |

## Introduction

|            |                    |                                                                                                                                                          |                                        |
|------------|--------------------|----------------------------------------------------------------------------------------------------------------------------------------------------------|----------------------------------------|
| Rationale  | <a href="#">#6</a> | Describe the rationale for the review in the context of what is already known                                                                            | Abstract and last part of Introduction |
| Objectives | <a href="#">#7</a> | Provide an explicit statement of the question(s) the review will address with reference to participants, interventions, comparators, and outcomes (PICO) | Last part of introduction              |

## Methods

|                      |                     |                                                                                                                                                                                                                               |                                                                 |
|----------------------|---------------------|-------------------------------------------------------------------------------------------------------------------------------------------------------------------------------------------------------------------------------|-----------------------------------------------------------------|
| Eligibility criteria | <a href="#">#8</a>  | Specify the study characteristics (such as PICO, study design, setting, time frame) and report characteristics (such as years considered, language, publication status) to be used as criteria for eligibility for the review | Methods and analysis: Eligibility criteria section              |
| Information sources  | <a href="#">#9</a>  | Describe all intended information sources (such as electronic databases, contact with study authors, trial registers or other grey literature sources) with planned dates of coverage                                         | Methods and analysis: Databases and search strategy section     |
| Search strategy      | <a href="#">#10</a> | Present draft of search strategy to be used for at least one electronic database, including planned limits, such that it could be repeated                                                                                    | Methods and analysis: Databases and search strategy section and |

## supplementary file 2

|                                         |                      |                                                                                                                                                                                                                      |                                                                                   |
|-----------------------------------------|----------------------|----------------------------------------------------------------------------------------------------------------------------------------------------------------------------------------------------------------------|-----------------------------------------------------------------------------------|
| Study records - data management         | <a href="#">#11a</a> | Describe the mechanism(s) that will be used to manage records and data throughout the review                                                                                                                         | Methods and analysis:<br>Study selection section                                  |
| Study records - selection process       | <a href="#">#11b</a> | State the process that will be used for selecting studies (such as two independent reviewers) through each phase of the review (that is, screening, eligibility and inclusion in meta-analysis)                      | Methods and analysis:<br>Study selection section                                  |
| Study records - data collection process | <a href="#">#11c</a> | Describe planned method of extracting data from reports (such as piloting forms, done independently, in duplicate), any processes for obtaining and confirming data from investigators                               | Methods and analysis:<br>Data extraction section                                  |
| Data items                              | <a href="#">#12</a>  | List and define all variables for which data will be sought (such as PICO items, funding sources), any pre-planned data assumptions and simplifications                                                              | Methods and analysis:<br>Data extraction section                                  |
| Outcomes and prioritization             | <a href="#">#13</a>  | List and define all outcomes for which data will be sought, including prioritization of main and additional outcomes, with rationale                                                                                 | Methods and analysis:<br>Data synthesis section                                   |
| Risk of bias in individual studies      | <a href="#">#14</a>  | Describe anticipated methods for assessing risk of bias of individual studies, including whether this will be done at the outcome or study level, or both; state how this information will be used in data synthesis | Methods and analysis:<br>Risk of bias assessment and Quality of evidence sections |
| Data synthesis                          | <a href="#">#15a</a> | Describe criteria under which study data will be quantitatively synthesised                                                                                                                                          | n/a (only qualitative synthesis will be sought due to expected heterogeneity)     |
| Data synthesis                          | <a href="#">#15b</a> | If data are appropriate for quantitative synthesis, describe planned summary measures, methods of handling data and methods of combining data from studies,                                                          | n/a (qualitative synthesis only)                                                  |

|                                   |                      |                                                                                                                               |                                                                        |
|-----------------------------------|----------------------|-------------------------------------------------------------------------------------------------------------------------------|------------------------------------------------------------------------|
|                                   |                      | including any planned exploration of consistency (such as I <sup>2</sup> , Kendall's $\tau$ )                                 |                                                                        |
| Data synthesis                    | <a href="#">#15c</a> | Describe any proposed additional analyses (such as sensitivity or subgroup analyses, meta-regression)                         | n/a                                                                    |
| Data synthesis                    | <a href="#">#15d</a> | If quantitative synthesis is not appropriate, describe the type of summary planned                                            | Methods and analysis:<br>Data synthesis section                        |
| Meta-bias(es)                     | <a href="#">#16</a>  | Specify any planned assessment of meta-bias(es) (such as publication bias across studies, selective reporting within studies) | Methods and analysis:<br>Risk of bias section                          |
| Confidence in cumulative evidence | <a href="#">#17</a>  | Describe how the strength of the body of evidence will be assessed (such as GRADE)                                            | Methods and analysis:<br>Risk of bias and Quality of evidence sections |

The PRISMA-P elaboration and explanation paper is distributed under the terms of the Creative Commons Attribution License CC-BY. This checklist was completed on 29. January 2022 using <https://www.goodreports.org/>, a tool made by the [EQUATOR Network](#) in collaboration with [Penelope.ai](#)
